# Supplementary material for: Copper-catalyzed one-pot synthesis of isoquinolines via oxidative α-amination under mild and sustainable conditions
Source: Royal Society of Chemistry journal article supplement (doi:10.1039/d6ra01207h), 2026-04-24

## Copper-Catalyzed One-Pot Synthesis of Isoquinolines *via* Oxidative $\alpha$ -Amination Under Mild and Sustainable Conditions

Ali Akbari<sup>a, \*</sup>, Danial Zand Hoseinshahi<sup>a</sup>

*Department of Chemistry, Faculty of Science, University of Jiroft, Jiroft, P. O. Box 8767161167, Iran. Tel.: +98-344-334-7061; fax: +98-344-334-7065; e-mail: a.akbari@ujiroft.ac.ir*

### ABSTRACT

A highly sustainable and operationally simple, copper-catalyzed multicomponent strategy is reported for the synthesis of structurally diverse isoquinolines from inexpensive and readily available phenylacetaldehyde derivatives, benzaldehydes, and ammonia (using 4 M NH<sub>3</sub> in methanol as a convenient nitrogen source). The transformation proceeds under remarkably mild conditions (room temperature), constituting a modified Pomeranz–Fritsch type cyclization that enables direct one-pot access to the target scaffolds in good to excellent yields. The protocol notably avoids harsh acidic conditions and prefunctionalized amine substrates. Mechanistic studies confirm a stepwise pathway involving the isolation of a key 1,4-diphenyl-2-azabutadiene intermediate and provide compelling evidence for radical involvement via TEMPO trapping. The combination of high atom efficiency, use of an earth-abundant copper catalyst, mild operational parameters, and mechanistic understanding demonstrates a practical and environmentally appealing approach to constructing important isoquinoline frameworks.

### Calculation and assessment of green-chemistry metrics

Atom economy (AE) was calculated based on the stoichiometric incorporation of phenylacetaldehyde, benzaldehyde, and ammonia into the isoquinoline framework, while excluding catalytic species and solvent from the calculation. Reaction mass efficiency (RME) was estimated from the isolated yield and the theoretical atom economy of the reaction.

Energy input values were calculated by multiplying the electrical power of the irradiation source by the total irradiation time and normalizing the value per mole of product formed. For comparison, energy consumption was evaluated for both CFL (23 W) and LED (10 W) light sources under the optimized reaction conditions.

The E factor was assessed qualitatively due to the complexity of accurately quantifying all waste streams. The evaluation considered the absence of stoichiometric activating reagents, the use of ethanol as the reaction solvent, the one-pot nature of the transformation, and the recyclability of the CuO/TiO<sub>2</sub> catalyst.

---

\* Corresponding author.  
E-mail address: author@university.edu

**Table S1.** Quantitative green chemistry metrics (AE, RME, energy input, catalyst recyclability, and sustainability indicators) for the optimized copper-catalyzed one-pot synthesis of 3-phenylisoquinoline (3a).

| Metric                            | Value                                | Basis / Notes                                                                                                                                            |
|-----------------------------------|--------------------------------------|----------------------------------------------------------------------------------------------------------------------------------------------------------|
| Reaction type                     | Multicomponent, one pot              | Avoids isolation of intermediates; reduces operational steps                                                                                             |
| Number of steps                   | 1                                    | Direct conversion to isoquinoline                                                                                                                        |
| Catalyst                          | CuO/TiO <sub>2</sub> (heterogeneous) | Earth-abundant support; recyclable under the tested conditions                                                                                           |
| Catalyst loading                  | 20 mg ( $\approx$ 5 wt% Cu)          | Reused for $\geq$ 7 cycles with minor performance decline                                                                                                |
| Solvent                           | EtOH (95%)                           | Relatively low-toxicity solvent; generally considered a preferable option                                                                                |
| Temperature                       | Room temperature                     | No external heating required under optimized conditions                                                                                                  |
| Light source                      | CFL (23 W) / LED (10 W)              | Visible-light irradiation; LED reduces energy input                                                                                                      |
| Reaction time                     | 14–24 h                              | Optimized at 14 h                                                                                                                                        |
| Isolated yield (3a)               | 93% (CFL), 86% (LED)                 | Corresponds to Table 1, Entry 25                                                                                                                         |
| Atom Economy (AE)                 | $\approx$ 78%                        | Calculated from overall stoichiometry                                                                                                                    |
| Reaction Mass Efficiency (RME)    | $\approx$ 72%                        | AE $\times$ isolated yield                                                                                                                               |
| Stoichiometric reagents           | None                                 | Only catalytic quantities of additives used                                                                                                              |
| Protecting groups                 | None                                 | Direct transformation                                                                                                                                    |
| E factor (qualitative)            | Moderate                             | Simple workup; solvent and oxidant still contribute to waste                                                                                             |
| Energy input (CFL)                | $\approx$ 1.5 kWh mol <sup>-1</sup>  | 23 W $\times$ 24 h                                                                                                                                       |
| Energy input (LED)                | $\approx$ 0.7 kWh mol <sup>-1</sup>  | 10 W $\times$ 14 h                                                                                                                                       |
| Energy reduction (LED vs CFL)     | $\sim$ 53%                           | Normalized energy comparison                                                                                                                             |
| Catalyst recyclability            | $\geq$ 7 cycles                      | Yield maintained at $\approx$ 92–93% across cycles                                                                                                       |
| Overall sustainability assessment | Moderately good                      | Meets several sustainability criteria (reduced energy, mild conditions, one-pot design) but <b>does not fully satisfy all green chemistry principles</b> |

## Characterization data for isoquinoline derivative

**3-Phenylisoquinoline (3a).** Yield: 1.84 g (90%), white solid, mp: 101 – 102 °C.

<sup>1</sup>H NMR (500 MHz, CDCl<sub>3</sub>): δ 9.35 (s, 1H), 8.18 – 8.12 (m, 2H), 8.06 (s, 1H), 7.97 (d, *J* = 8.5 Hz, 1H), 7.85 (d, *J* = 8.0 Hz, 1H), 7.70 – 7.65 (m, 1H), 7.60 – 7.55 (m, 1H), 7.55 – 7.50 (m, 2H), 7.45 – 7.40 (m, 1H) ppm.

<sup>13</sup>C NMR (125 MHz, CDCl<sub>3</sub>): δ 152.5, 151.3, 139.7, 136.7, 130.6, 128.9, 128.6, 127.8, 127.7, 127.2, 127.1, 127.0, 116.6 ppm.

HRMS (ESI) *m/z*: Calcd for C<sub>15</sub>H<sub>12</sub>N [M+H]<sup>+</sup>: 206.0964. Found: 206.0966.

**6-Methyl-3-phenylisoquinoline (3b).** Yield: 2.00 g (91%), yellow solid, mp: 115 – 116 °C.

<sup>1</sup>H NMR (500 MHz, CDCl<sub>3</sub>): δ 9.26 (s, 1H), 8.12 (d, *J* = 7.5 Hz, 2H), 8.02 (s, 1H), 7.80 – 7.70 (m, 2H), 7.55 – 7.45 (m, 3H), 7.41 (t, *J* = 7.5 Hz, 1H), 2.55 (s, 3H) ppm.

<sup>13</sup>C NMR (125 MHz, CDCl<sub>3</sub>): δ 151.8, 150.5, 139.7, 137.3, 135.1, 133.1, 128.9, 128.5, 128.1, 127.0, 126.9, 126.5, 116.6, 22.0 ppm.

HRMS (ESI) *m/z*: Calcd for C<sub>16</sub>H<sub>14</sub>N [M+H]<sup>+</sup>: 220.1121. Found: 220.1127.

**6-Methoxy-3-phenylisoquinoline (3c).** Yield: 2.21 g (94%), Light yellow solid, mp: 101 – 102 °C.

<sup>1</sup>H NMR (500 MHz, CDCl<sub>3</sub>): δ 9.19 (s, 1H), 8.11 (dd, *J* = 8.0, 1.5 Hz, 2H), 7.97 (s, 1H), 7.87 (d, *J* = 9.0 Hz, 1H), 7.50 (tt, *J* = 7.5, 1.5 Hz, 2H), 7.42 (tt, *J* = 7.0, 1.5 Hz, 1H), 7.20 (dd, *J* = 8.5, 2.0 Hz, 1H), 7.11 (sd, *J* = 2.0 Hz, 1H), 3.96 (s, 3H) ppm.

<sup>13</sup>C NMR (125 MHz, CDCl<sub>3</sub>): δ 161.3, 151.8, 151.6, 139.8, 138.8, 129.4, 128.9, 128.6, 127.1, 123.7, 120.4, 116.1, 104.5, 55.6 ppm.

HRMS (ESI) *m/z*: Calcd for C<sub>16</sub>H<sub>14</sub>NO [M+H]<sup>+</sup>: 236.1070. Found: 236.1065.

**6-Fluoro-3-phenylisoquinoline (3d).** Yield: 1.85 g (83%), Light yellow solid, mp: 123 – 124 °C.

<sup>1</sup>H NMR (500 MHz, CDCl<sub>3</sub>): δ 9.29 (s, 1H), 8.11 (d, *J* = 8.5 Hz, 2H), 8.50 – 7.93 (m, 2H), 7.52 (t, *J* = 8.5 Hz, 2H), 7.48 – 7.40 (m, 2H), 7.33 (td, *J* = 8.5, 2.0 Hz, 1H) ppm.

<sup>13</sup>C NMR (125 MHz, CDCl<sub>3</sub>): δ 163.5 (d, *J* = 252.5 Hz), 152.10, 152.06, 139.2, 138.2 (d, *J* = 10.6 Hz), 130.6 (d, *J* = 9.9 Hz), 128.9, 127.1, 125.0, 117.7 (d, *J* = 25.9 Hz), 116.1 (d, *J* = 5.5 Hz), 110.30 (d, *J* = 21.1 Hz) ppm.

HRMS (ESI) *m/z*: Calcd for C<sub>15</sub>H<sub>11</sub>FN [M+H]<sup>+</sup>: 224.0870. Found: 224.0875.

**3-(2-Chlorophenyl)isoquinoline (3e).** Yield: 2.13 g (86%), white solid, mp: 45 – 46 °C.

<sup>1</sup>H NMR (500 MHz, CDCl<sub>3</sub>): δ 9.36 (s, 1H), 8.05 – 8.00 (m, 2H), 8.87 (d, *J* = 8.0 Hz, 1H), 7.76 – 7.68 (m, 2H), 7.66 (m, 1H), 7.52 (dd, *J* = 8.0, 1.5 Hz, 1H), 7.39 (td, *J* = 7.5, 1.5 Hz, 1H), 7.34 (td, *J* = 7.5, 2.0 Hz, 1H) ppm.

<sup>13</sup>C NMR (125 MHz, CDCl<sub>3</sub>): δ 152.2, 150.3, 139.3, 136.0, 132.6, 132.0, 130.8, 130.3, 129.4, 127.71, 127.67, 127.66, 127.11, 127.07, 121.4 ppm.

HRMS (ESI) *m/z*: Calcd for C<sub>15</sub>H<sub>11</sub>ClN [M+H]<sup>+</sup>: 240.0574. Found: 240.0575.

**3-(4-Chlorophenyl)isoquinoline (3f).** Yield: 2.04 g (85%), Light yellow solid, mp: 141 – 142 °C.

<sup>1</sup>H NMR (500 MHz, CDCl<sub>3</sub>): δ 9.32 (s, 1H), 8.07 (d, *J* = 8.5 Hz, 2H), 8.03 (s, 1H), 7.98 (d, *J* = 8.0 Hz, 1H), 7.86 (d, *J* = 8.0 Hz, 1H), 7.67 – 7.73 (m, 1H), 7.62 – 7.56 (m, 1H), 7.47 (d, *J* = 8.5 Hz, 2H) ppm.

<sup>13</sup>C NMR (125 MHz, CDCl<sub>3</sub>): δ 152.5, 150.0, 137.9, 136.7, 134.8, 131.0, 129.1, 128.4, 127.9, 127.8, 127.5, 127.1, 116.7 ppm.

HRMS (ESI) *m/z*: Calcd for C<sub>15</sub>H<sub>11</sub>ClN [M+H]<sup>+</sup>: 240.0574. Found: 240.0573.

**3-(4-Fluorophenyl)isoquinoline (3g).** Yield: 1.88 g (84%), yellow solid, mp: 107 – 108 °C.

<sup>1</sup>H NMR (500 MHz, CDCl<sub>3</sub>): δ 9.31 (s, 1H), 8.13 – 8.07 (m, 2H), 8.02 – 7.95 (m, 2H), 7.85 (d, *J* = 8.0 Hz, 1H), 7.72 – 7.66 (m, 1H), 7.62 – 7.56 (m, 1H), 7.19 (t, *J* = 9.0 Hz, 2H) ppm.

<sup>13</sup>C NMR (101 MHz, CDCl<sub>3</sub>): δ 163.4 (d, *J* = 222.3 Hz), 152.5, 150.3, 136.8, 135.7 (d, *J* = 3.0 Hz), 130.9, 128.9 (d, *J* = 8.2 Hz), 127.7, 127.3, 127.0, 116.4, 115.8 (d, *J* = 21.8 Hz) ppm.

HRMS (ESI) *m/z*: Calcd for C<sub>15</sub>H<sub>11</sub>FN [M+H]<sup>+</sup>: 224.0870. Found: 224.0874.

**3-(4-(Trifluoromethyl)phenyl)isoquinoline (3h).** Yield: 2.21 g (81%), yellow solid, mp: 158 – 159 °C.

<sup>1</sup>H NMR (500 MHz, CDCl<sub>3</sub>): δ 9.34 (s, 1H), 8.23 (d, *J* = 8.0 Hz, 2H), 8.08 (s, 1H), 7.99 (d, *J* = 8.0 Hz, 1H), 7.87 (d, *J* = 8.5 Hz, 1H), 7.76 – 7.70 (m, 3H), 7.64 – 7.58 (m, 1H) ppm.

<sup>13</sup>C NMR (125 MHz, CDCl<sub>3</sub>): δ 152.8, 149.6, 143.0, 136.6, 131.0, 130.4 (d, *J* = 45.4 Hz), 129.1 (d, *J* = 146.8 Hz), 128.2, 127.8, 127.7, 127.3, 127.2, 125.8 (q, *J* = 3.9 Hz), 117.4 ppm.

HRMS (ESI) *m/z*: Calcd for C<sub>16</sub>H<sub>11</sub>F<sub>3</sub>N [M+H]<sup>+</sup>: 274.0838. Found: 274.0831.

**3-(Pyridin-4-yl)isoquinoline (3i).** Yield: 1.79 g (87%), yellow solid, mp: 127 – 128 °C.

<sup>1</sup>H NMR (500 MHz, CDCl<sub>3</sub>): δ 9.32 (s, 1H), 8.74 – 8.69 (m, 2H), 8.12 (s, 1H), 8.02 – 7.95 (m, 3H), 7.87 (d, *J* = 8.0 Hz, 1H), 7.74 – 7.68 (m, 1H), 7.65 – 7.60 (m, 1H) ppm.

<sup>13</sup>C NMR (125 MHz, CDCl<sub>3</sub>): δ 152.9, 150.4, 148.3, 146.8, 136.3, 131.0, 128.6, 128.2, 127.7, 127.3, 121.2, 117.8 ppm.

HRMS (ESI) *m/z*: Calcd for C<sub>14</sub>H<sub>11</sub>N<sub>2</sub> [M+H]<sup>+</sup>: 207.0917. Found: 207.0915.

**3-(2-Methoxyphenyl)isoquinoline (3j).** Yield: 2.19 g (93%), yellow solid, mp: 129 – 130 °C.

<sup>1</sup>H NMR (500 MHz, CDCl<sub>3</sub>): δ 9.36 (s, 1H), 8.22 (s, 1H), 8.00 – 7.92 (m, 2H), 7.84 (d, *J* = 8.5 Hz, 1H), 7.70 – 7.63 (m, 1H), 7.60 – 7.52 (m, 1H), 7.43 – 7.36 (m, 1H), 7.18 – 7.12 (m, 1H), 7.04 (d, *J* = 8.5 Hz, 1H), 3.89 (s, 3H) ppm.

<sup>13</sup>C NMR (125 MHz, CDCl<sub>3</sub>): δ 157.1, 151.9, 149.2, 136.2, 131.5, 130.3, 129.6, 129.1, 127.43, 127.36, 127.03, 127.01, 121.2, 121.1, 111.4, 55.7 ppm.

HRMS (ESI) m/z: Calcd for C<sub>16</sub>H<sub>14</sub>NO [M+H]<sup>+</sup>: 236.1070. Found: 236.1061.

**3-(4-Methoxyphenyl)isoquinoline (3k)**. Yield: 2.21 g (94%), yellow solid, mp: 100 – 101 °C.

<sup>1</sup>H NMR (500 MHz, CDCl<sub>3</sub>): δ 9.31 (s, 1H), 8.08 (d, *J* = 9.0 Hz, 2H), 7.98 (s, 1H), 7.96 (d, *J* = 8.5, 1H), 7.83 (d, *J* = 8.5, 1H), 7.69 – 7.64 (m, 1H), 7.57 – 7.52 (m, 1H), 7.04 (d, *J* = 8.5 Hz, 2H), 3.88 (s, 3H) ppm.

<sup>13</sup>C NMR (125 MHz, CDCl<sub>3</sub>): δ 160.3, 152.3, 151.0, 137.0, 132.1, 130.7, 128.4, 127.8, 127.5, 126.9, 115.6, 114.3, 55.5 ppm.

HRMS (ESI) m/z: Calcd for C<sub>16</sub>H<sub>14</sub>NO [M+H]<sup>+</sup>: 236.1070. Found: 236.1066.

**3-(4-(*tert*-Butyl)phenyl)isoquinoline (3l)**. Yield: 2.38 g (91%), yellow solid, mp: 74 – 75 °C.

<sup>1</sup>H NMR (500 MHz, CDCl<sub>3</sub>): δ 9.35 (s, 1H), 8.10 (d, *J* = 8.5, 2H), 8.05 (s, 1H), 7.97 (d, *J* = 8.0 Hz, 1H), 7.85 (d, *J* = 8.0 Hz, 1H), 7.69 – 7.64 (m, 1H), 7.59 – 7.52 (m, 3H), 1.42 (s, 9H) ppm.

<sup>13</sup>C NMR (125 MHz, CDCl<sub>3</sub>): δ 152.4, 151.7, 151.3, 136.82, 136.77, 130.5, 127.72, 127.66, 127.0, 126.8, 125.9, 116.2, 34.8, 31.4 ppm.

HRMS (ESI) m/z: Calcd for C<sub>19</sub>H<sub>20</sub>N [M+H]<sup>+</sup>: 262.1590. Found: 262.1596.

**6-Methoxy-3-(4-methoxyphenyl)isoquinoline (3m)**. Yield: 2.55 g (96%), yellow solid, mp: 113 – 114 °C.

<sup>1</sup>H NMR (500 MHz, CDCl<sub>3</sub>): δ 9.16 (s, 1H), 8.08 (d, *J* = 9.0 Hz, 2H), 7.89 (s, 1H), 7.83 (d, *J* = 8.5 Hz, 1H), 7.21 (d, *J* = 8.0 Hz, 1H), 7.08 (d, *J* = 8.5 Hz, 1H), 7.04 (d, *J* = 8.5 Hz, 2H), 3.95 (s, 3H), 3.88 (s, 3H) ppm.

<sup>13</sup>C NMR (125 MHz, CDCl<sub>3</sub>): δ 161.3, 160.3, 151.0, 139.1, 132.1, 130.7, 128.5, 128.3, 123.3, 120.4, 115.6, 114.3, 104.3, 55.5, 55.0 ppm.

HRMS (ESI) m/z: calcd for C<sub>17</sub>H<sub>16</sub>NO<sub>2</sub> [M + H]<sup>+</sup>: 266.1176. found, 266.1168.

**3-(4-Phenoxyphenyl)isoquinoline (3p)**. Yield: 2.76 g (93%), brown solid, mp: 106 – 107 °C.

<sup>1</sup>H NMR (500 MHz, CDCl<sub>3</sub>): δ 9.33 (s, 1H), 8.12 (d, *J* = 9.0 Hz, 2H), 8.02 (s, 1H), 7.97 (dd, *J* = 8.0, 1.0 Hz, 1H), 7.85 (dd, *J* = 8.0, 1.0 Hz, 1H), 7.70 – 7.66 (m, 1H), 7.60 – 7.55 (m, 1H), 7.41 – 7.35 (m, 2H), 7.18 – 7.12 (m, 3H), 7.12 – 7.08 (m, 2H) ppm.

<sup>13</sup>C NMR (125 MHz, CDCl<sub>3</sub>): δ 157.9, 157.1, 152.5, 150.8, 136.8, 134.8, 130.7, 129.9, 128.6, 127.69, 127.66, 127.1, 126.9, 123.6, 119.2, 119.1, 116.0 ppm.

HRMS (ESI) m/z: Calcd for C<sub>21</sub>H<sub>16</sub>NO [M+H]<sup>+</sup>: 298.1226. Found: 298.1221.

**3-([1,1'-Biphenyl]-4-yl)isoquinoline (3o)**. Yield: 2.50 g (89%), yellow solid, mp: 97 – 99 °C.

<sup>1</sup>H NMR (500 MHz, CDCl<sub>3</sub>): δ 9.37 (s, 1H), 8.24 (d, *J* = 8.0, 1.0 Hz, 2H), 8.11 (s, 1H), 7.99 (d, *J* = 8.5 Hz, 1H), 7.86 (d, *J* = 8.5 Hz, 1H), 7.77 (d, *J* = 8.0, 2H), 7.73 – 7.65 (m, 3H), 7.58 (t, *J* = 8.0 Hz, 1H), 7.49 (t, *J* = 7.5 Hz, 2H), 7.39 (t, *J* = 7.5 Hz, 1H) ppm.

<sup>13</sup>C NMR (125 MHz, CDCl<sub>3</sub>): δ 152.5, 150.8, 141.4, 140.8, 138.5, 136.8, 130.7, 128.9, 127.9, 127.7, 127.62, 127.58, 127.5, 127.24, 127.20, 127.0, 116.6 ppm.

HRMS (ESI) m/z: Calcd for C<sub>21</sub>H<sub>16</sub>N [M+H]<sup>+</sup>: 282.1277. Found: 282.1272.

**4-(Isoquinolin-3-yl)-*N,N*-dimethylaniline (3af)**. Yield: 2.33 g (94%), Light yellow solid, mp: 138 – 139 °C.

<sup>1</sup>H NMR (500 MHz, CDCl<sub>3</sub>): δ 9.29 (s, 1H), 8.06 (d, *J* = 9.0 Hz, 2H), 7.97 – 7.92 (m, 2H), 7.81 (dd, *J* = 8.5, 1.0 Hz, 1H), 7.66 – 7.62 (m, 1H), 7.52 – 7.48 (m, 1H), 6.85 (d, *J* = 9.0 Hz, 2H), 3.04 (s, 6H) ppm.

<sup>13</sup>C NMR (125 MHz, CDCl<sub>3</sub>): δ 152.1, 151.5, 150.9, 137.1, 130.6, 127.9, 127.7, 127.3, 127.2, 126.8, 126.4, 114.5, 112.6, 40.6 ppm.

HRMS (ESI) m/z: Calcd for C<sub>17</sub>H<sub>17</sub>N<sub>2</sub> [M+H]<sup>+</sup>: 249.1386. Found: 249.1382.

## NMR spectra

The <sup>1</sup>H and <sup>13</sup>C NMR spectra of all synthesized compounds are provided below.

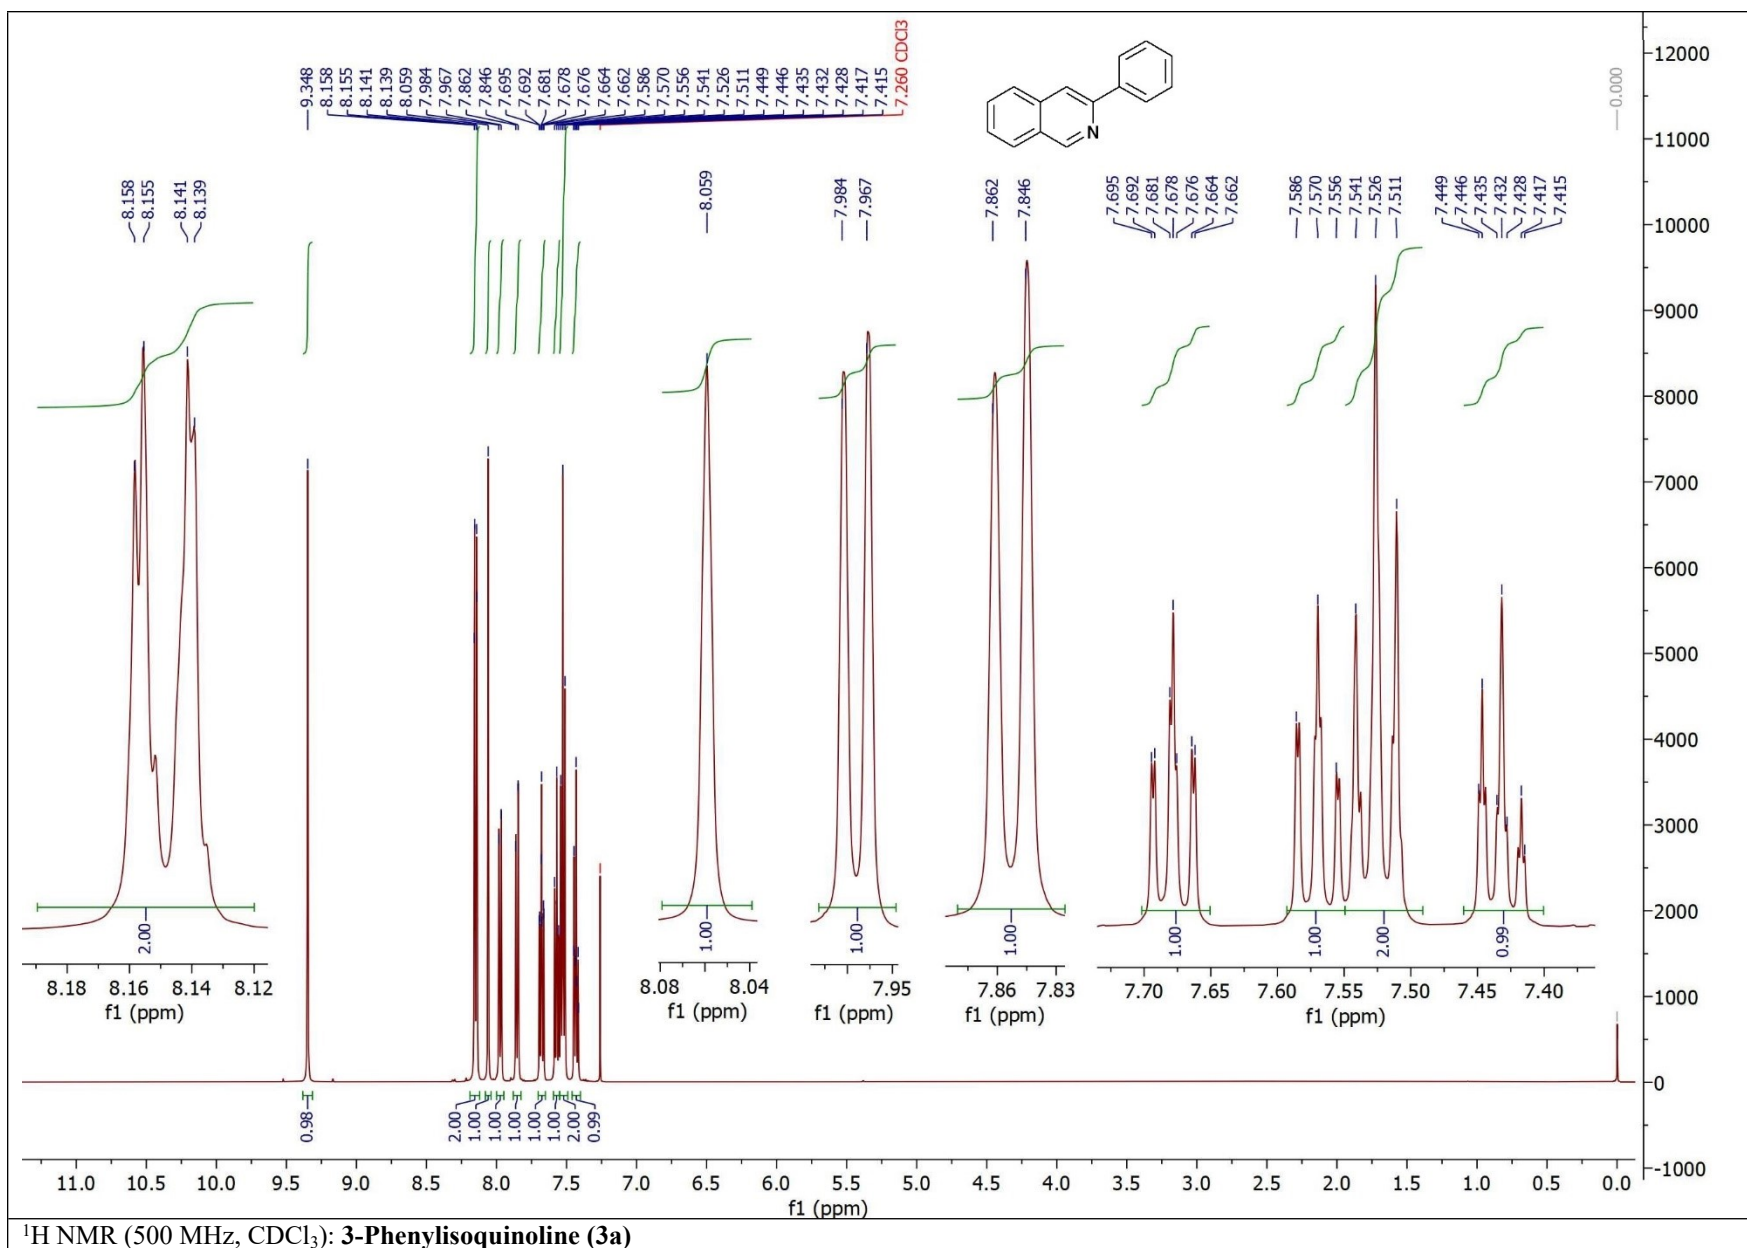

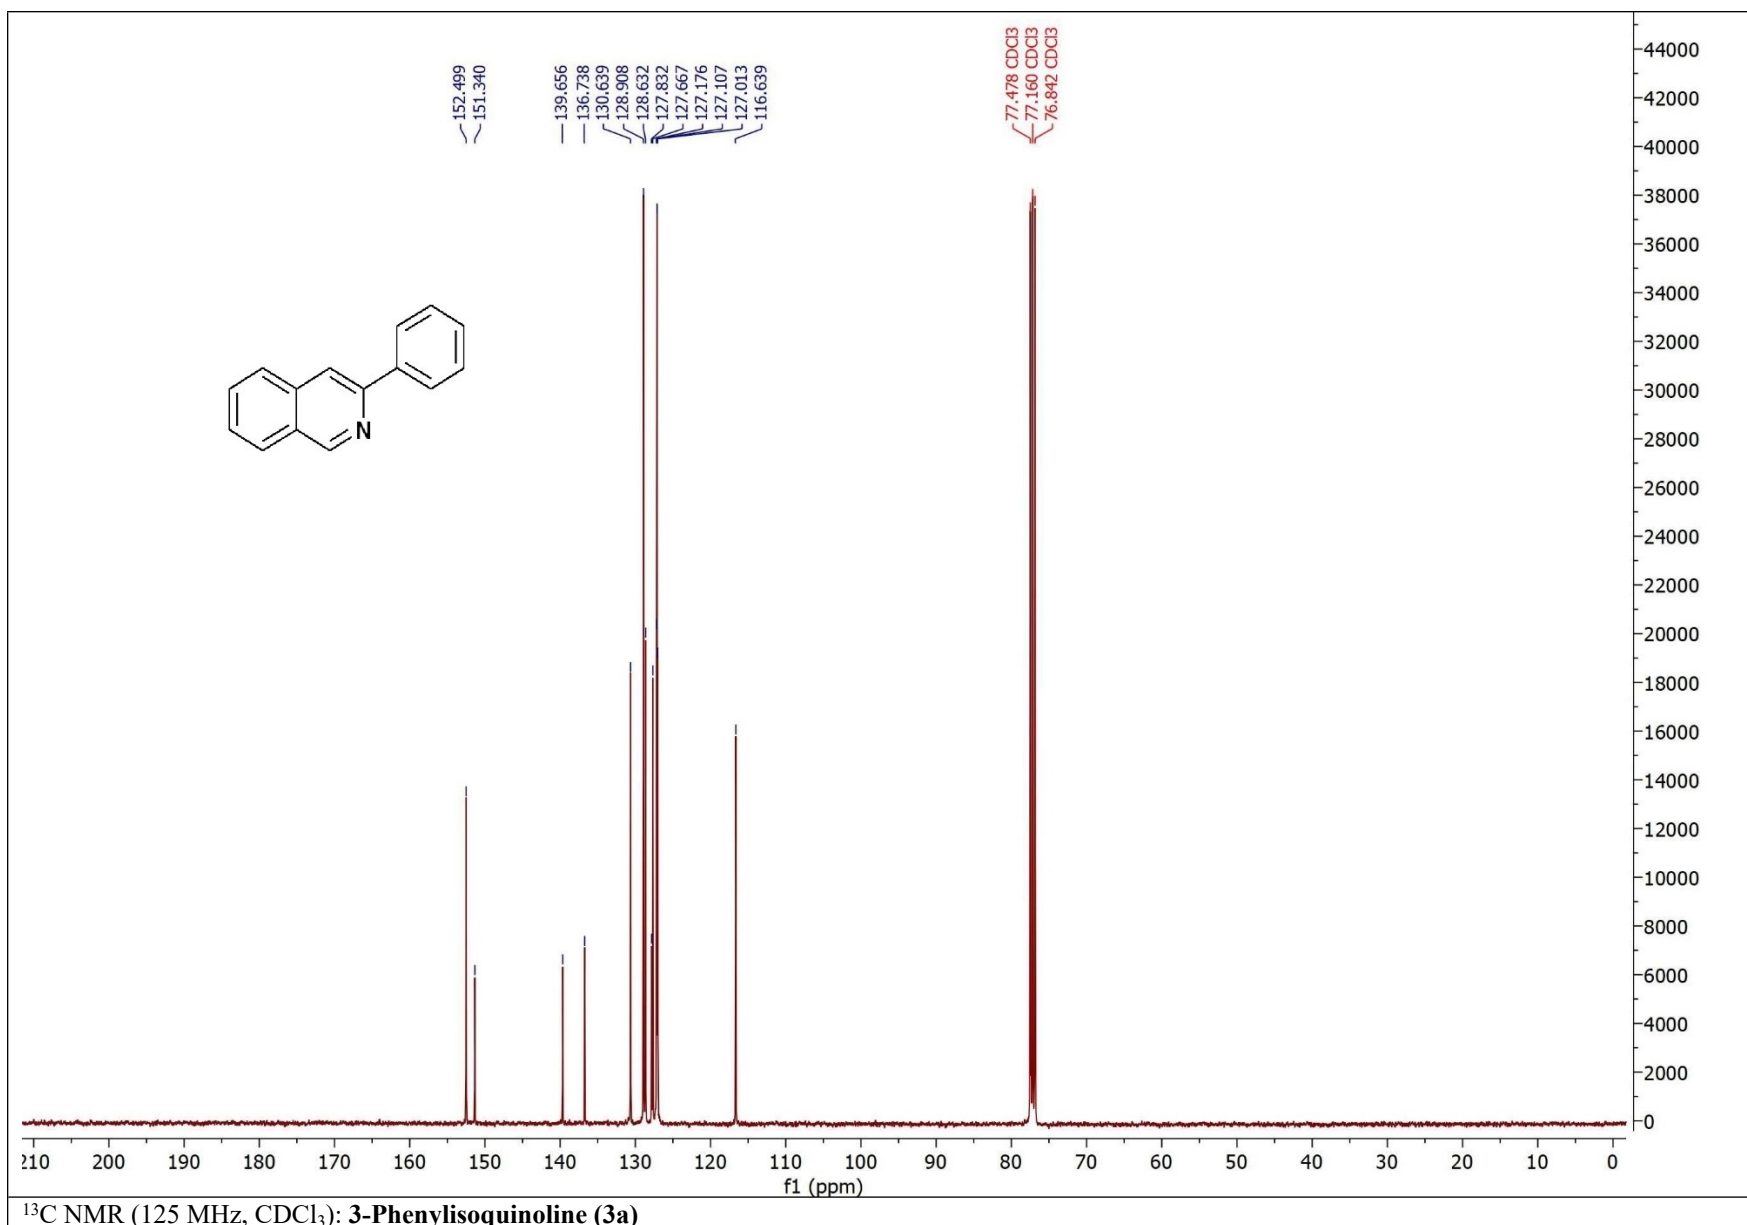



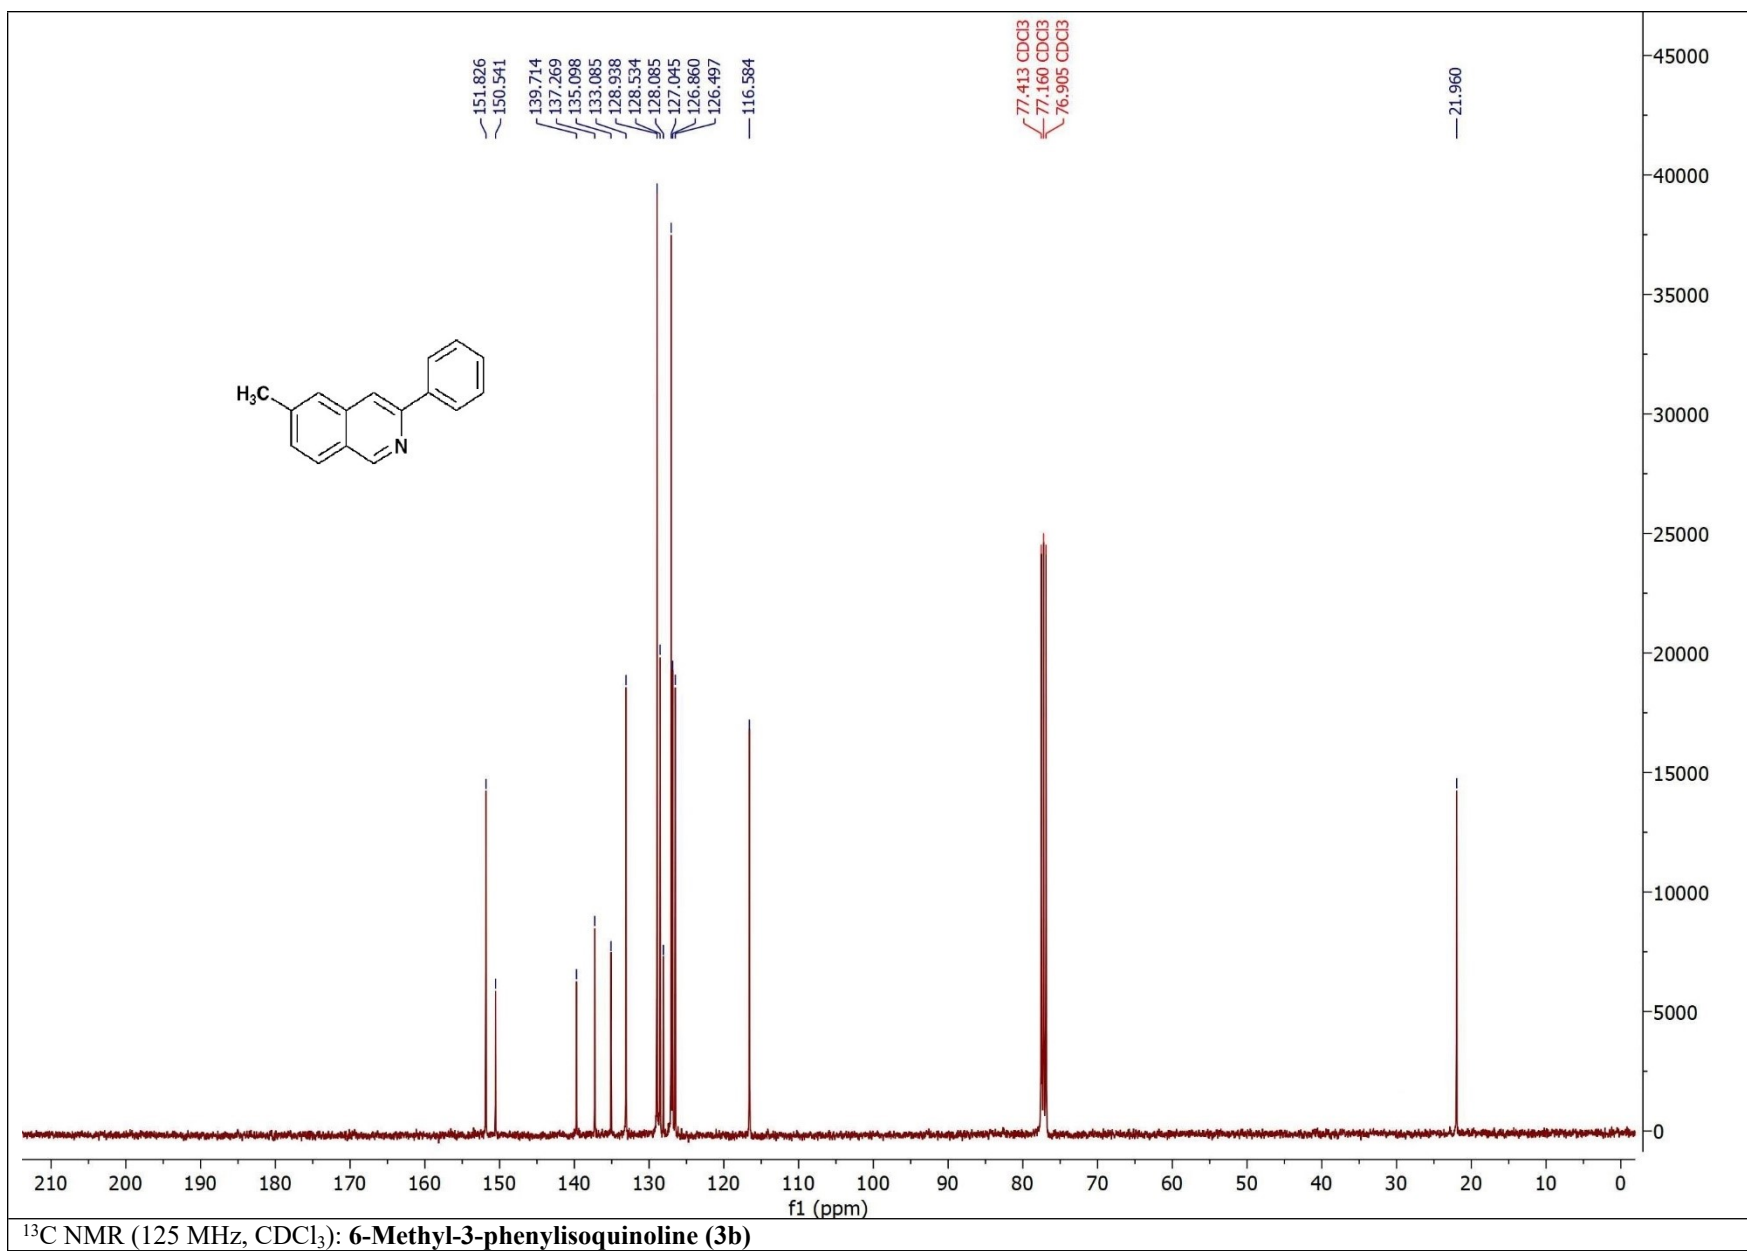

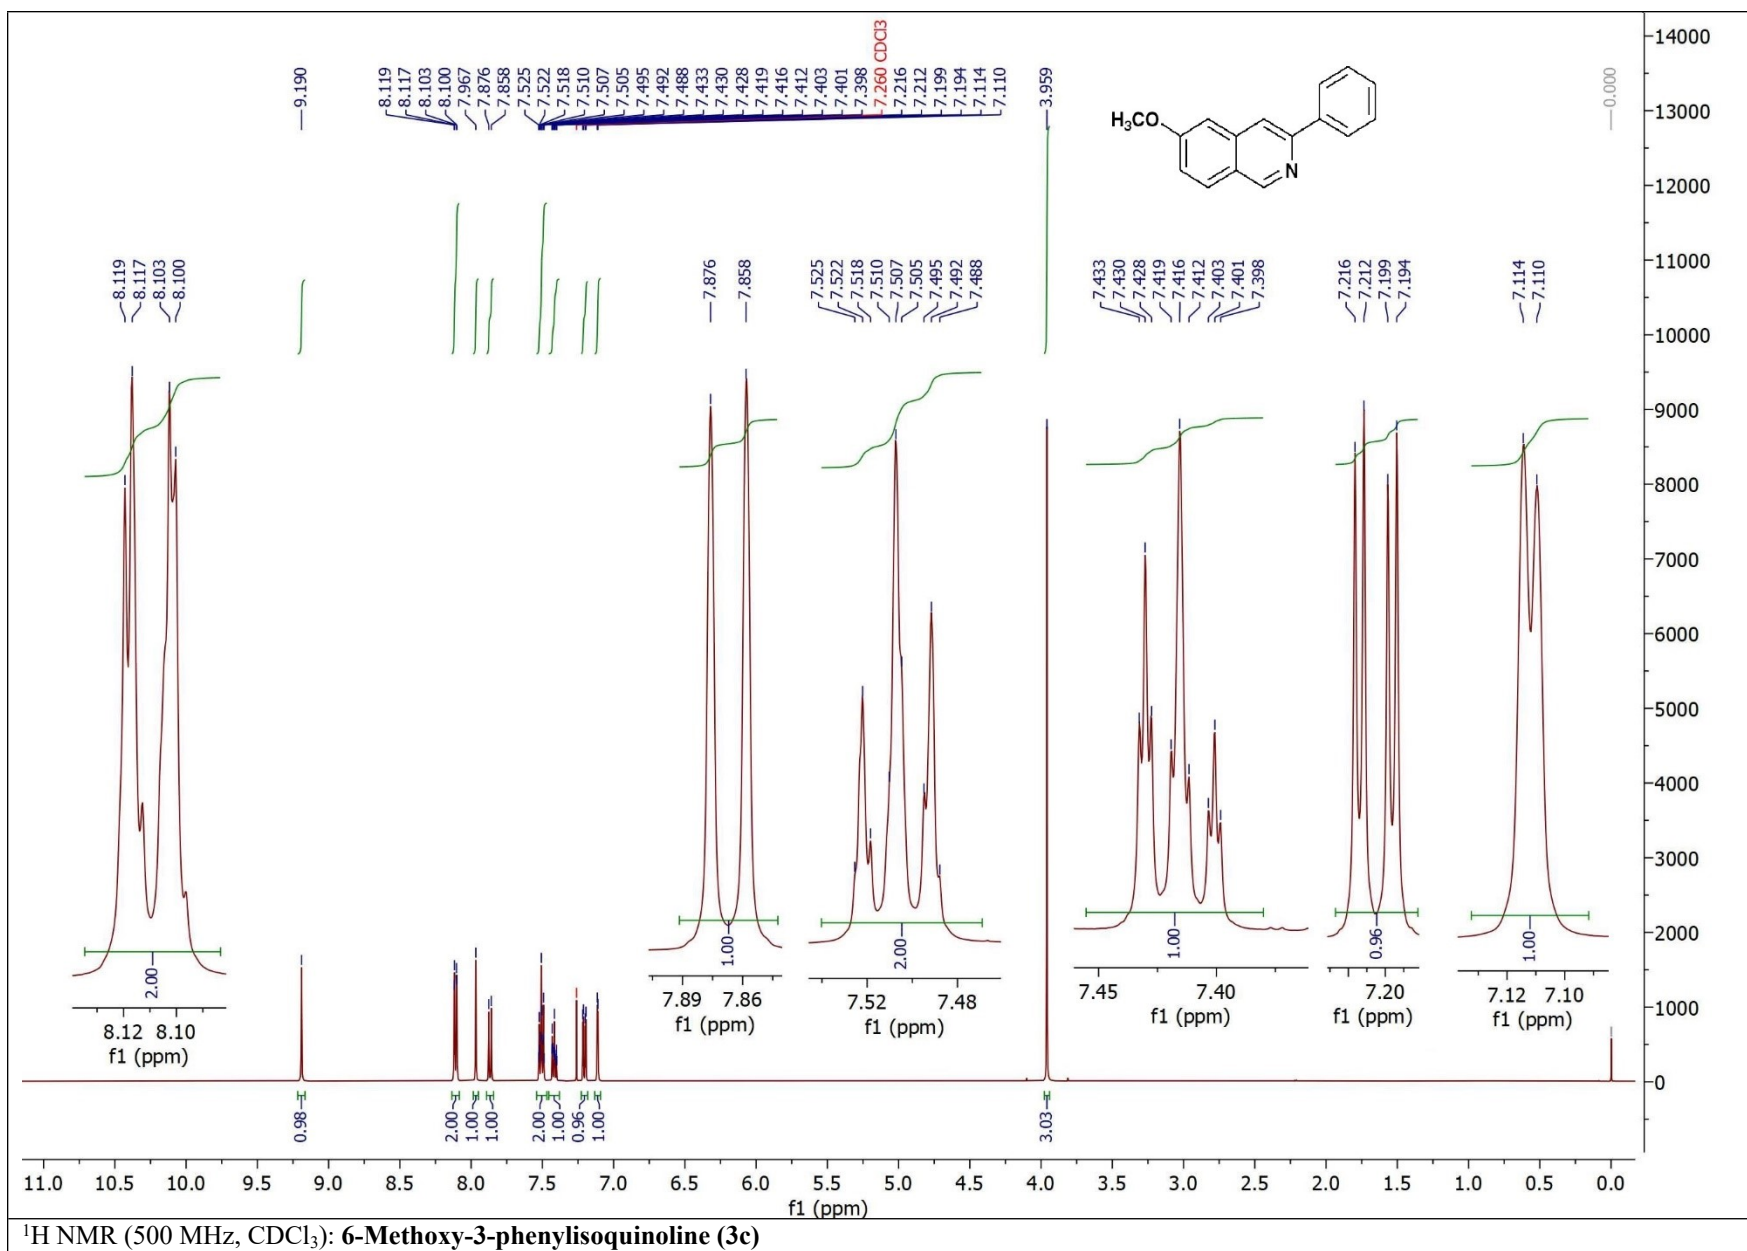

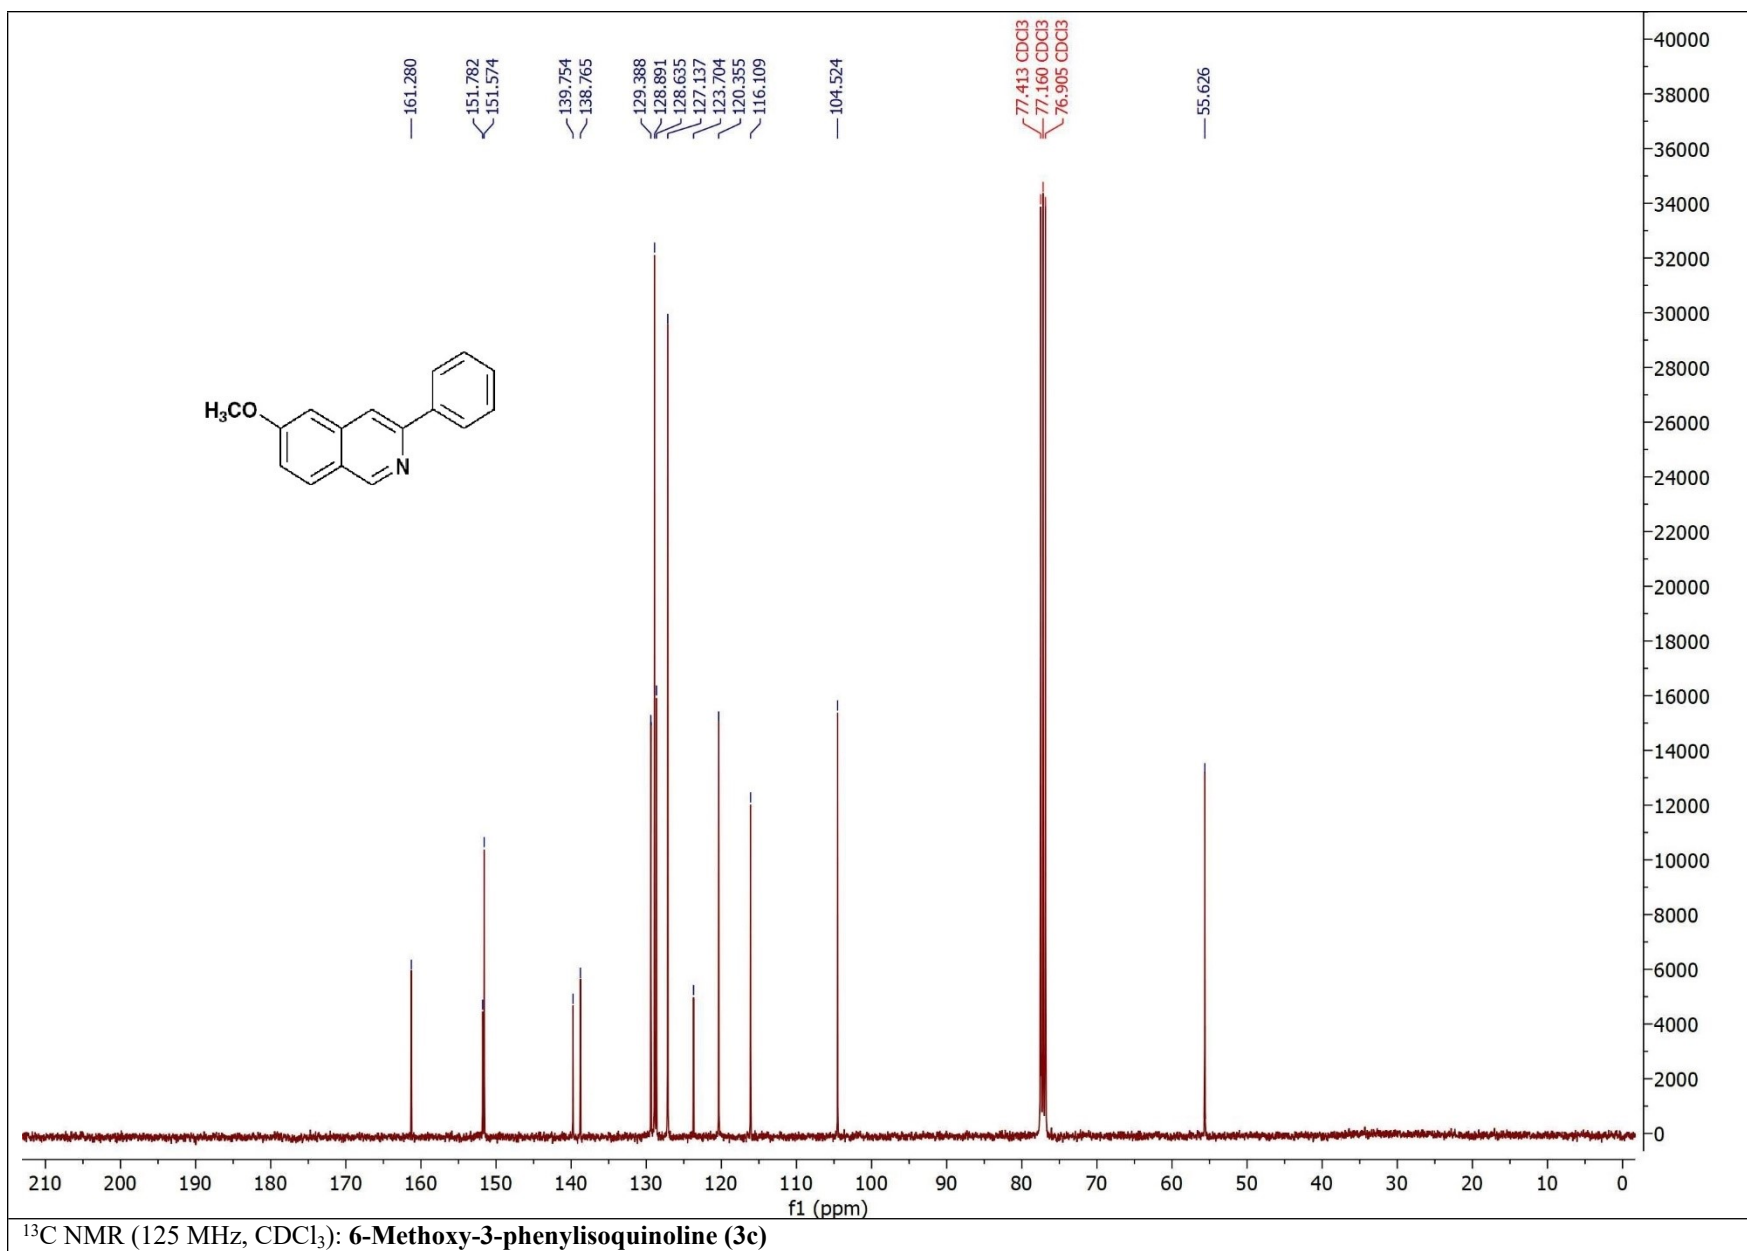

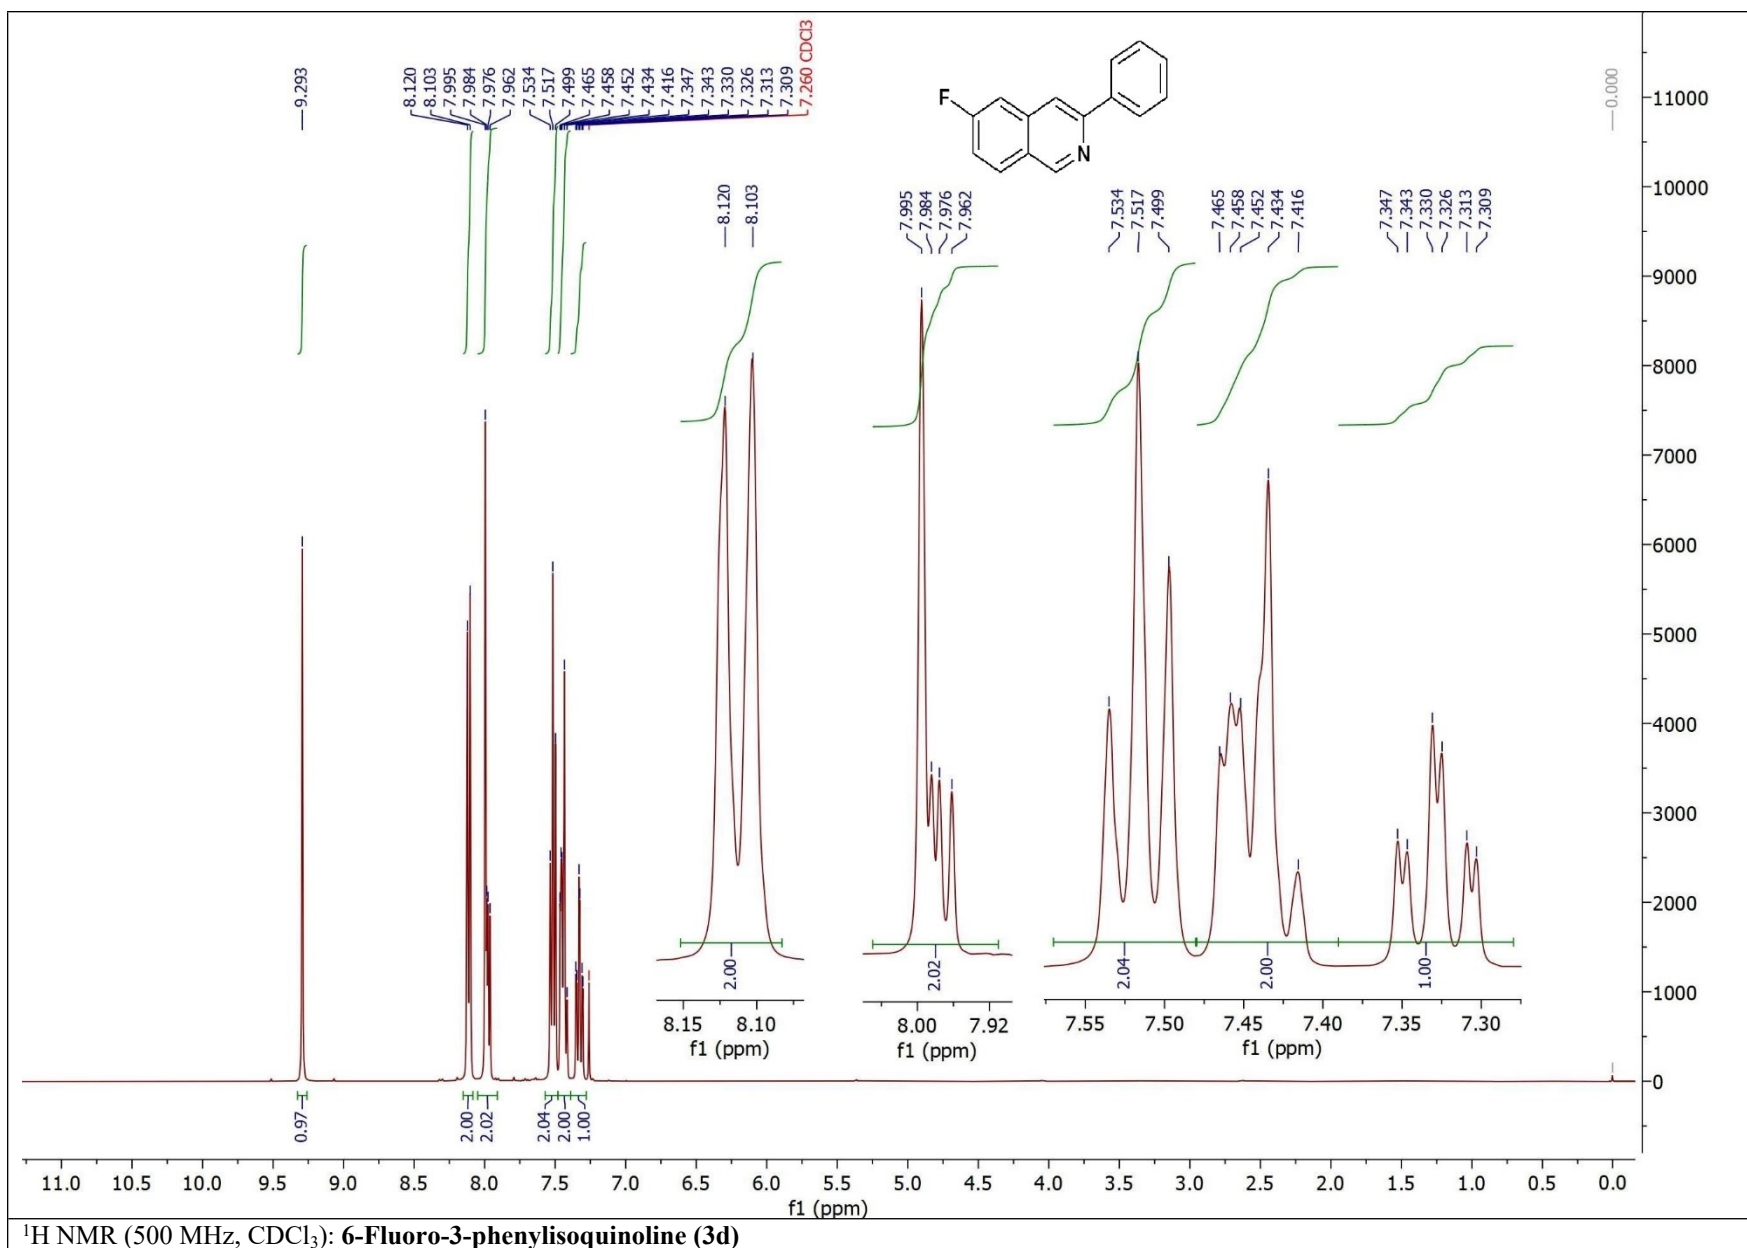

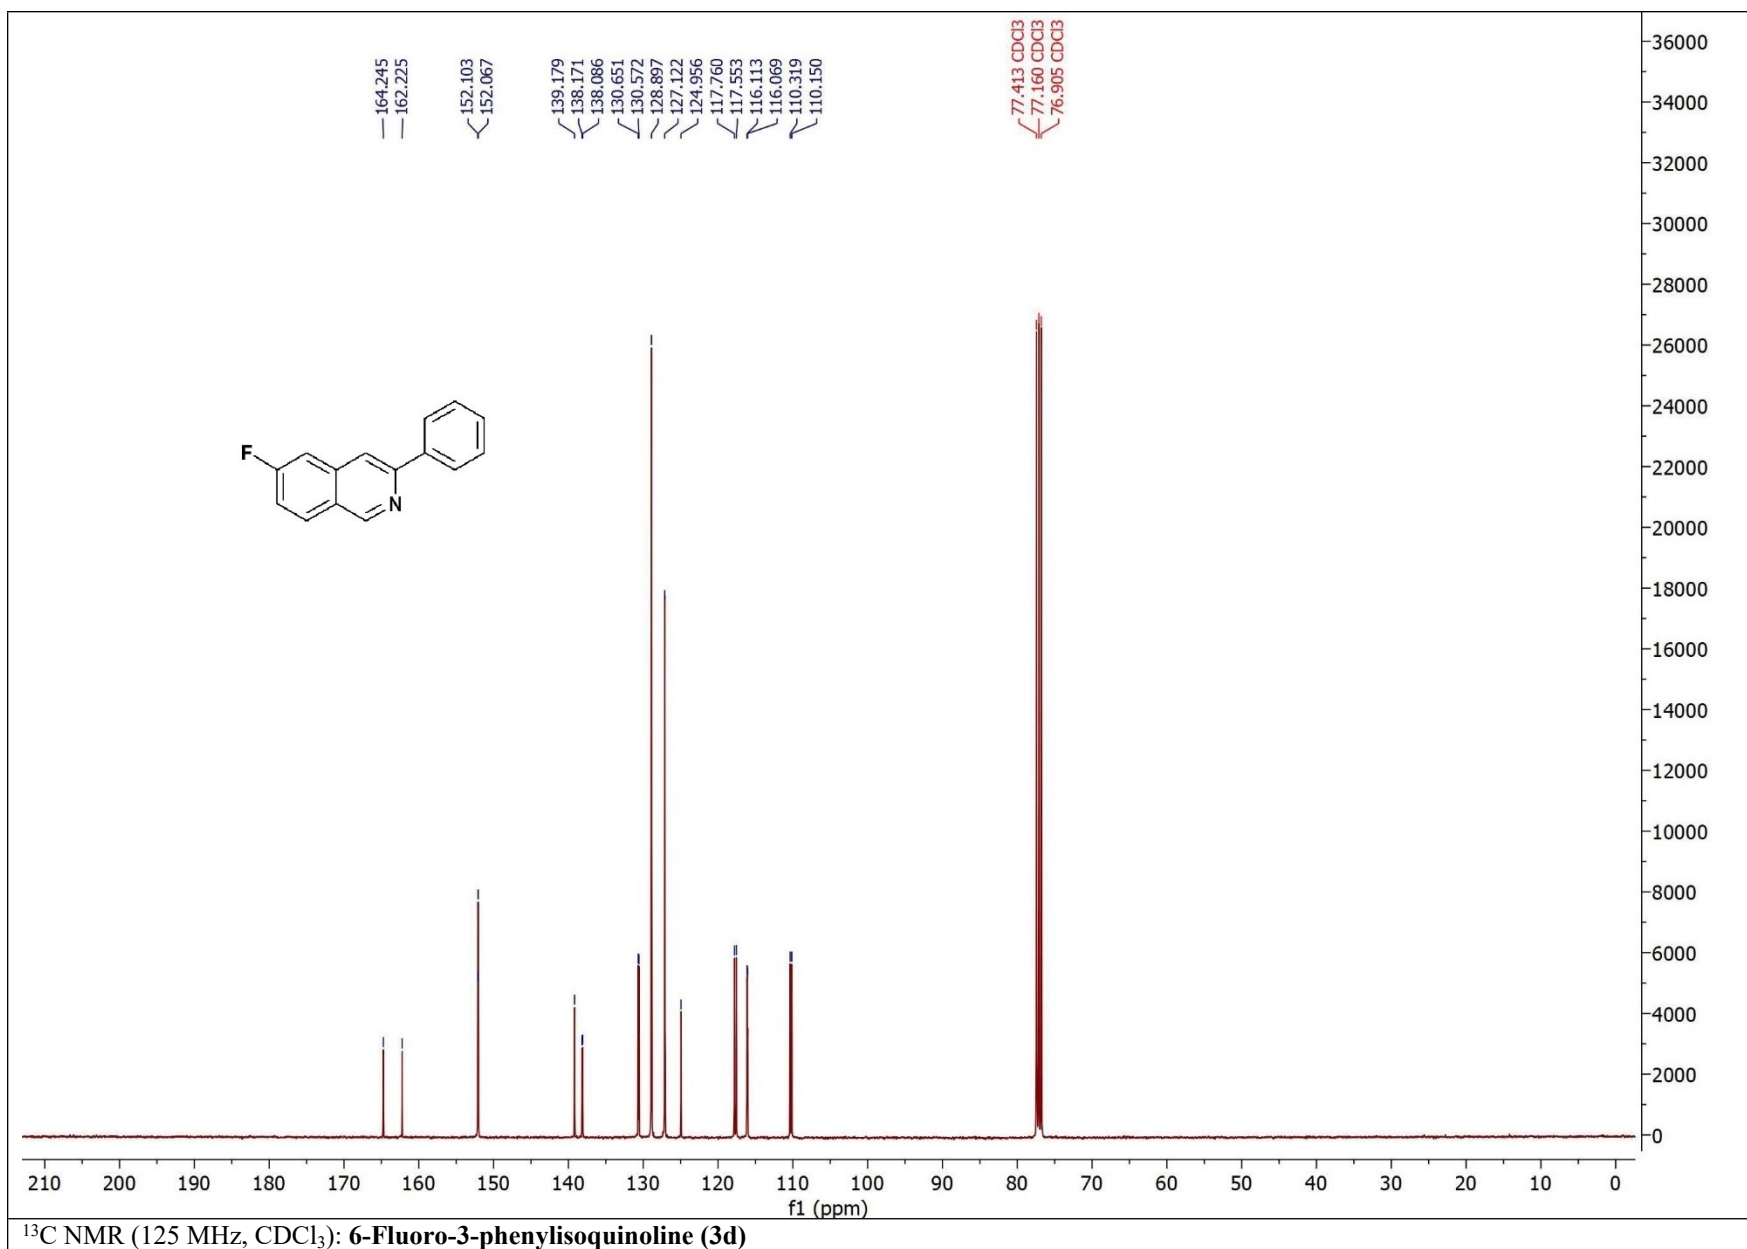



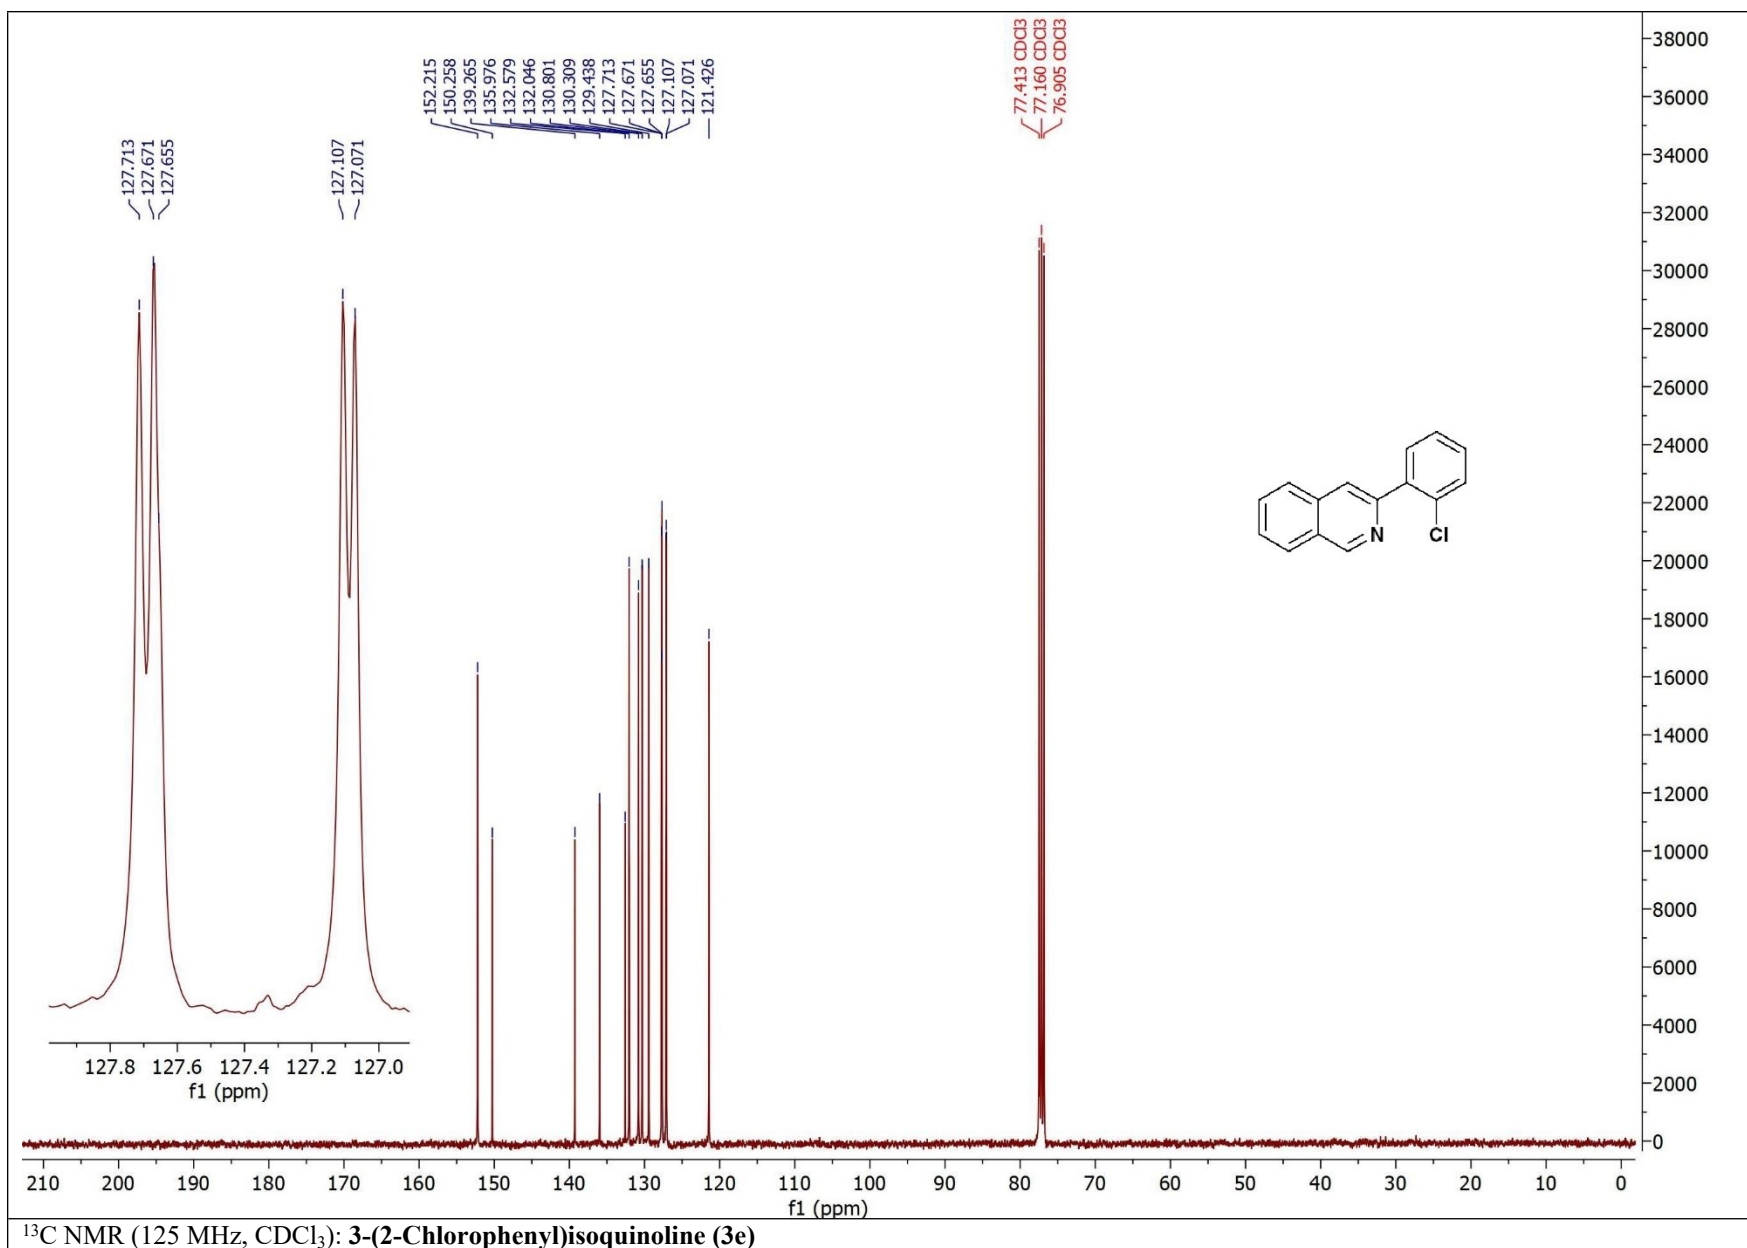

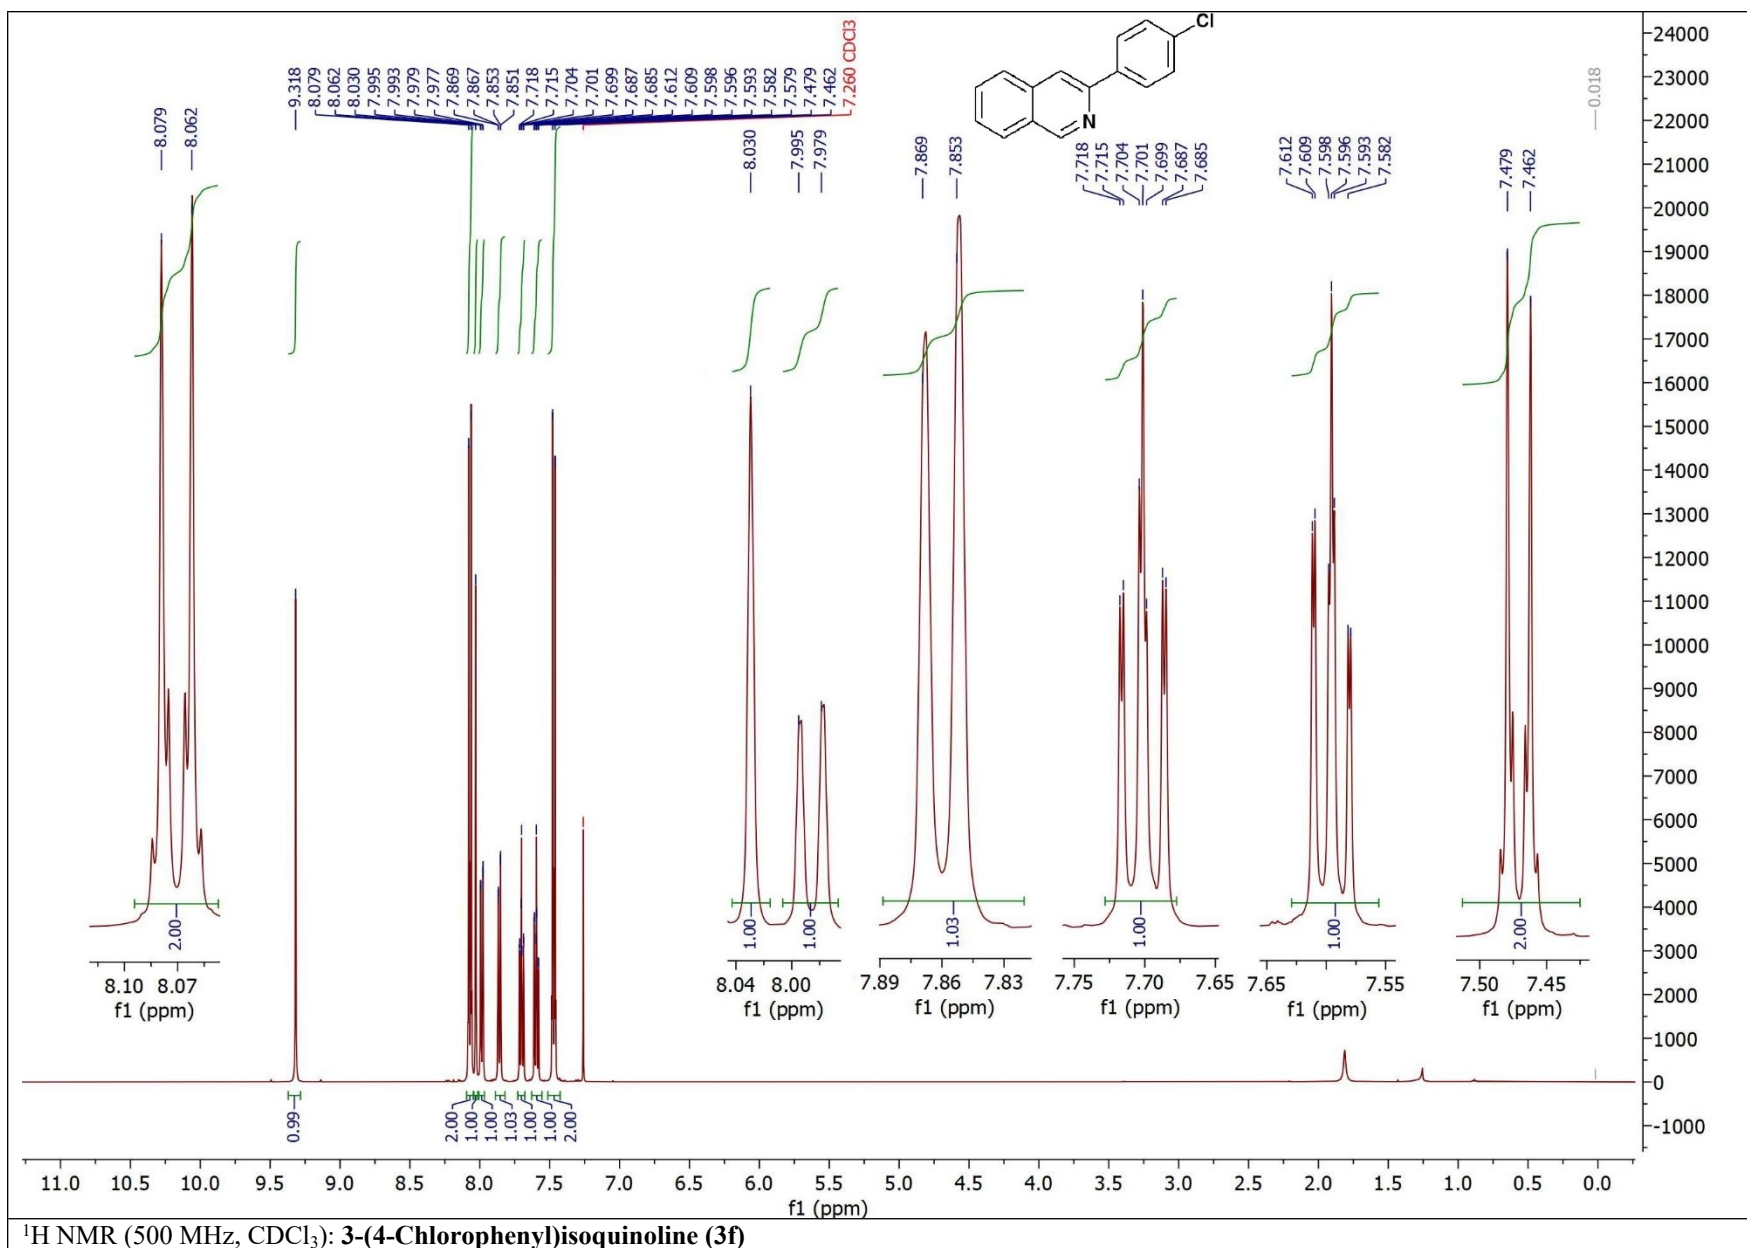

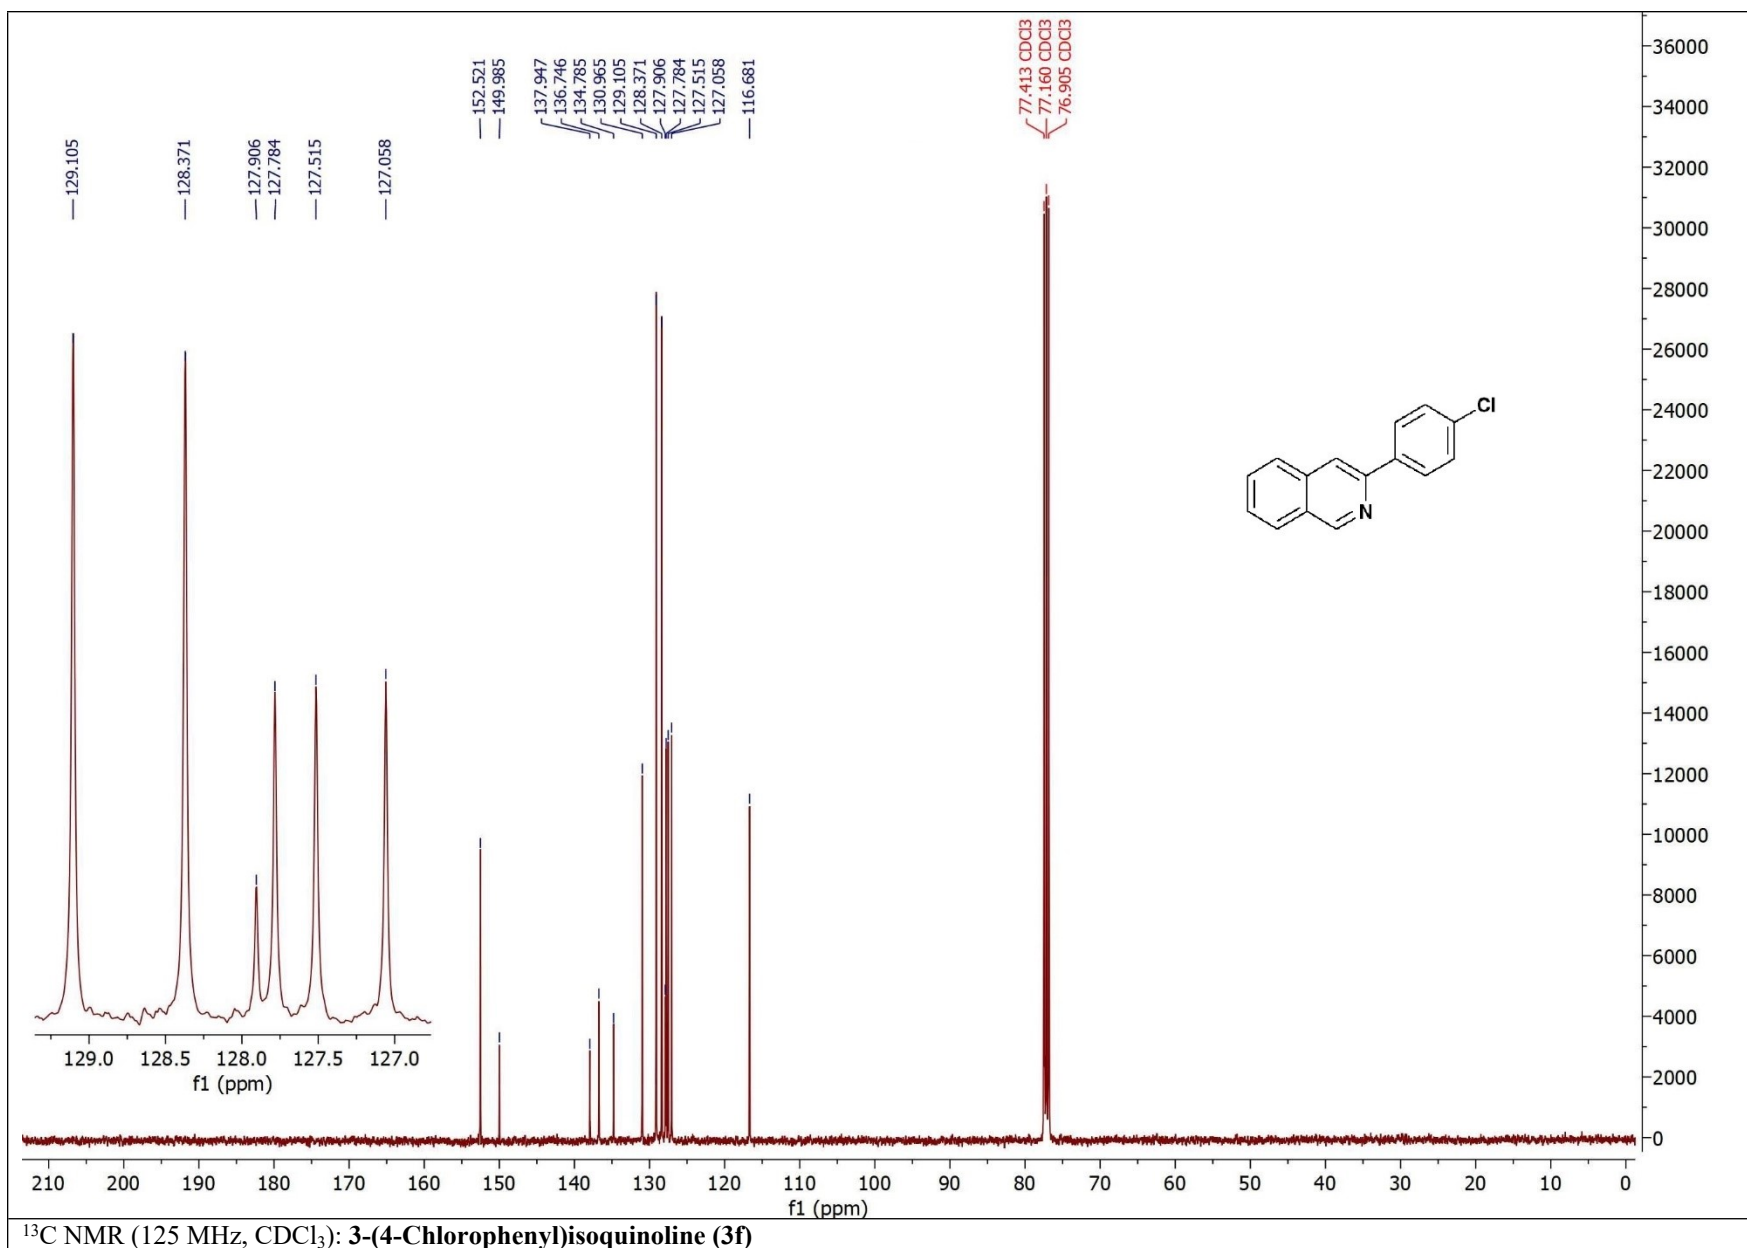

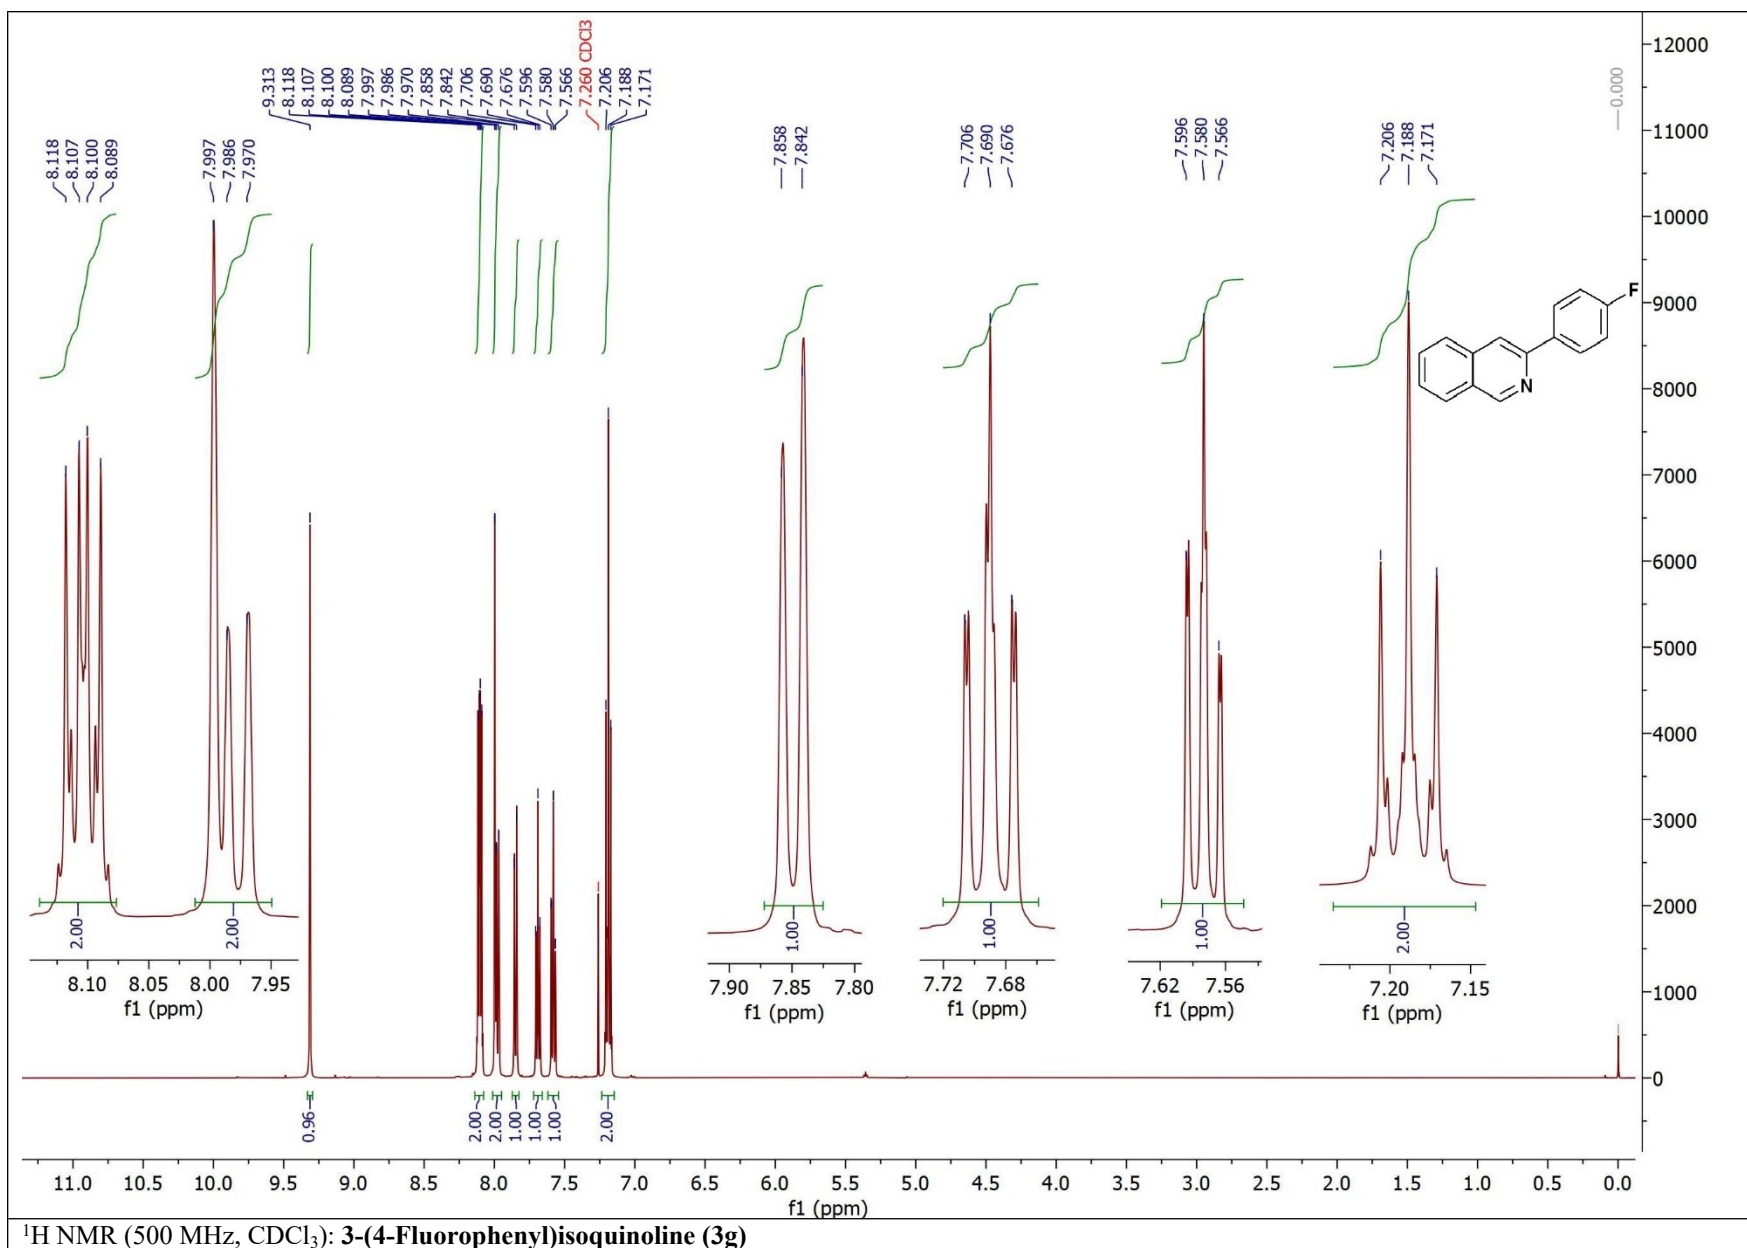

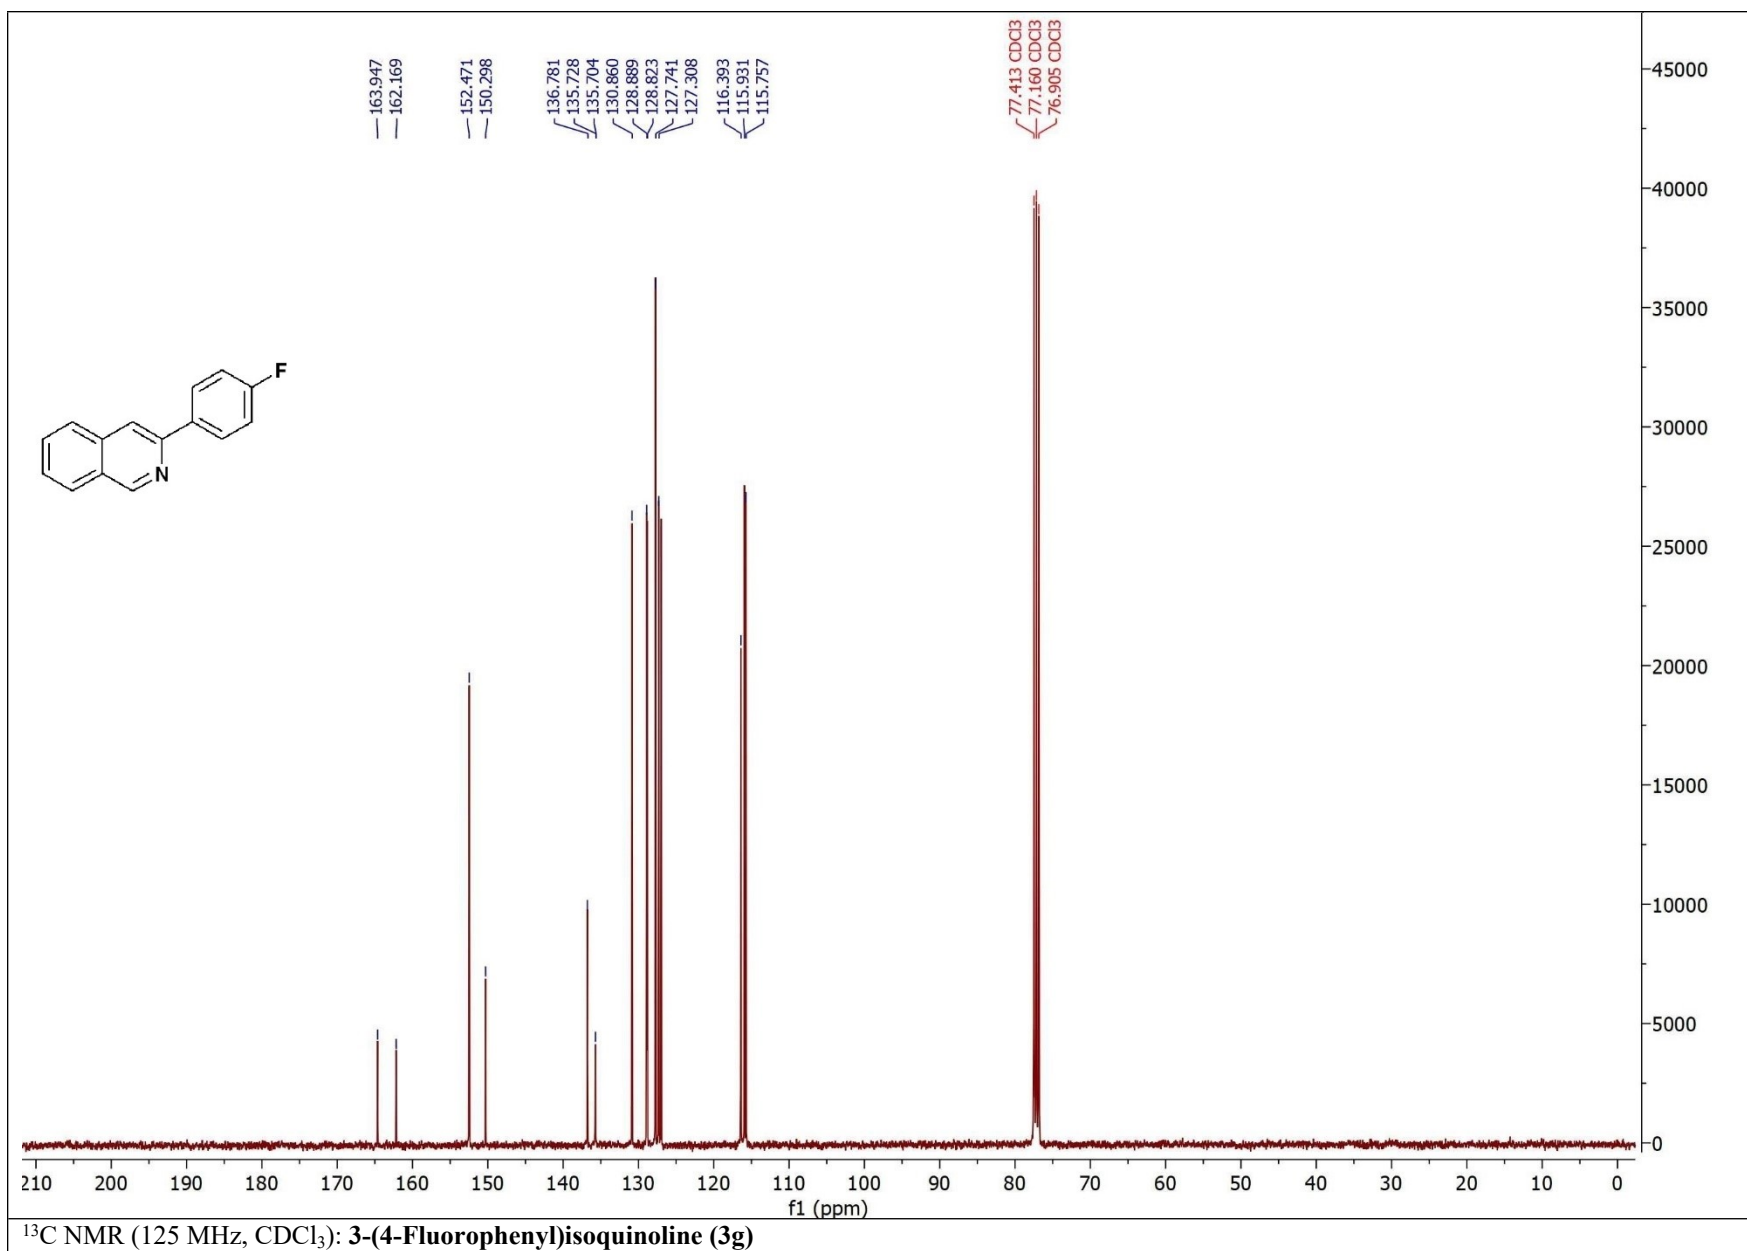

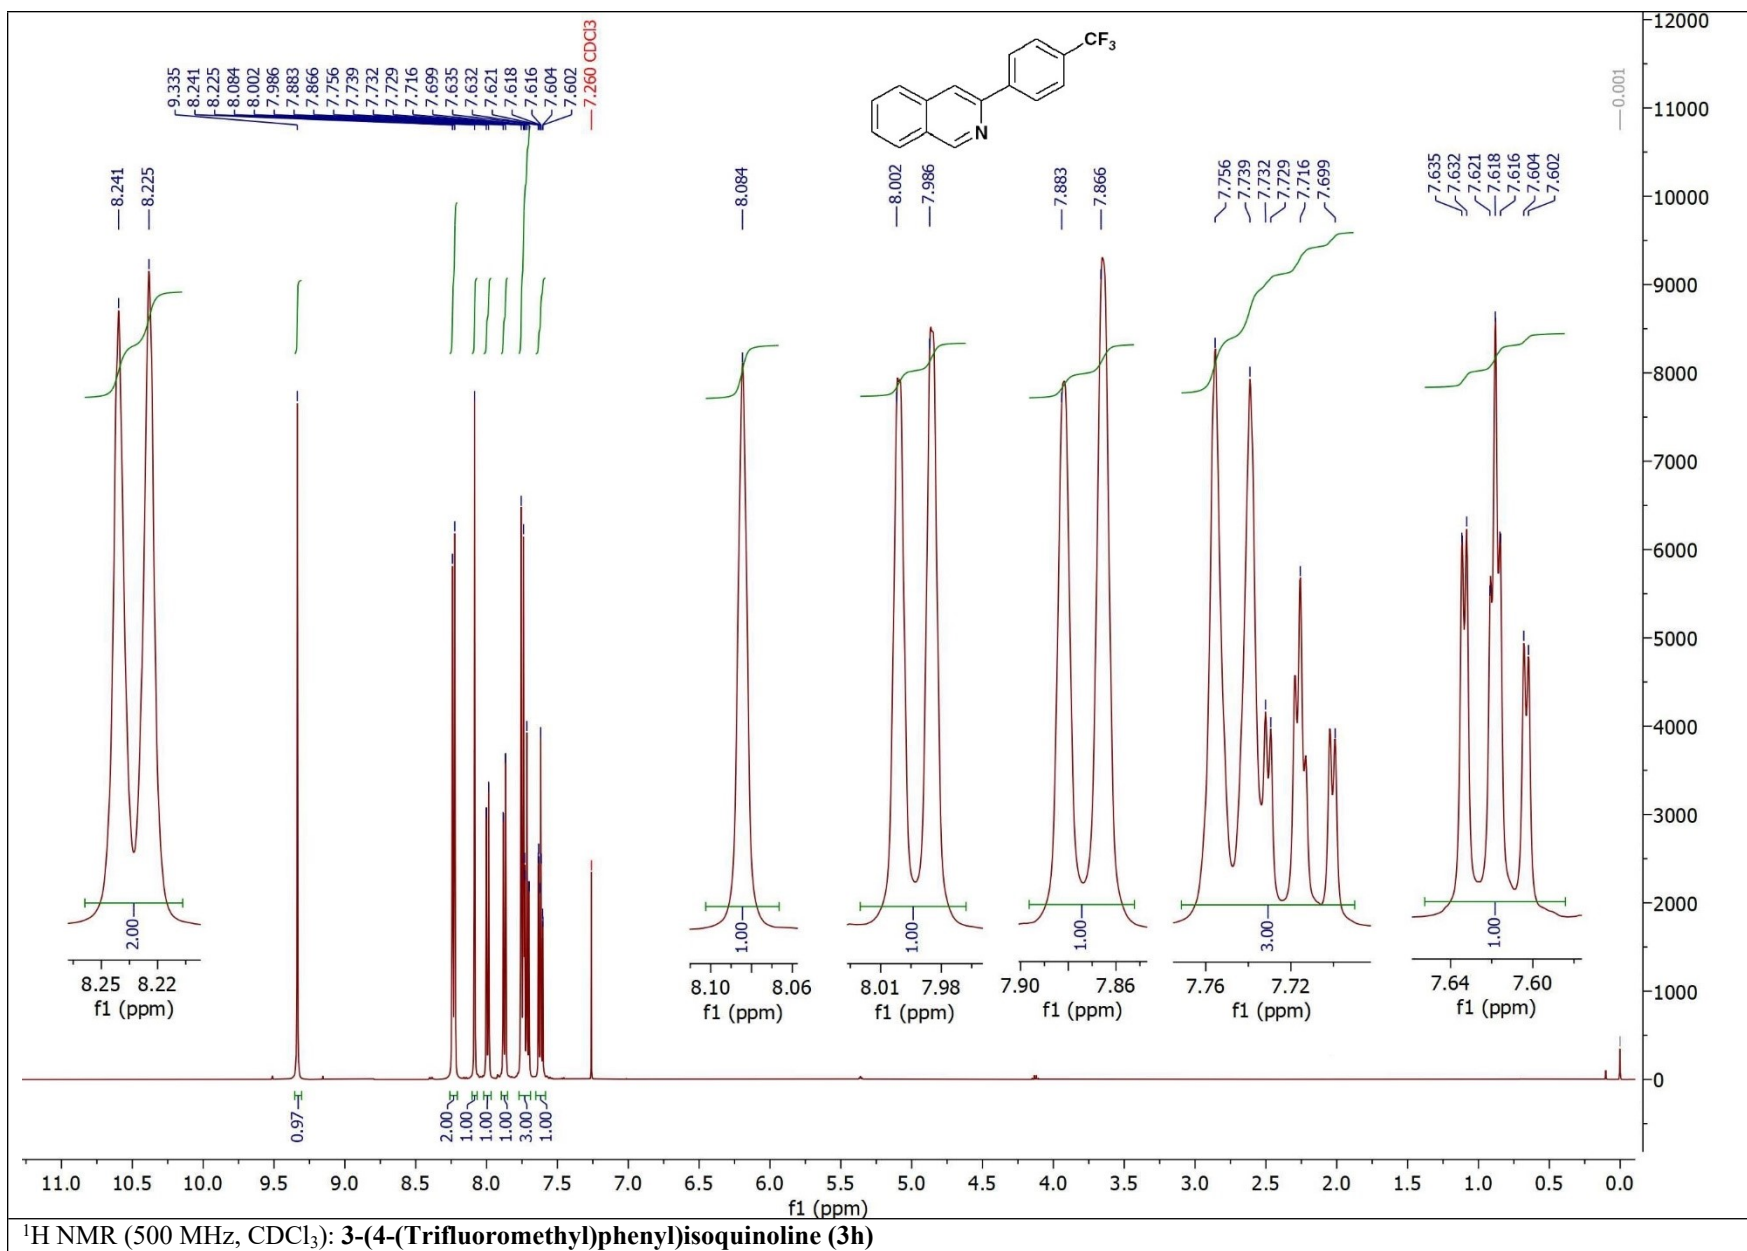

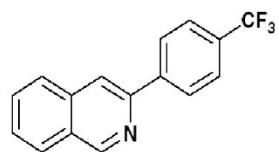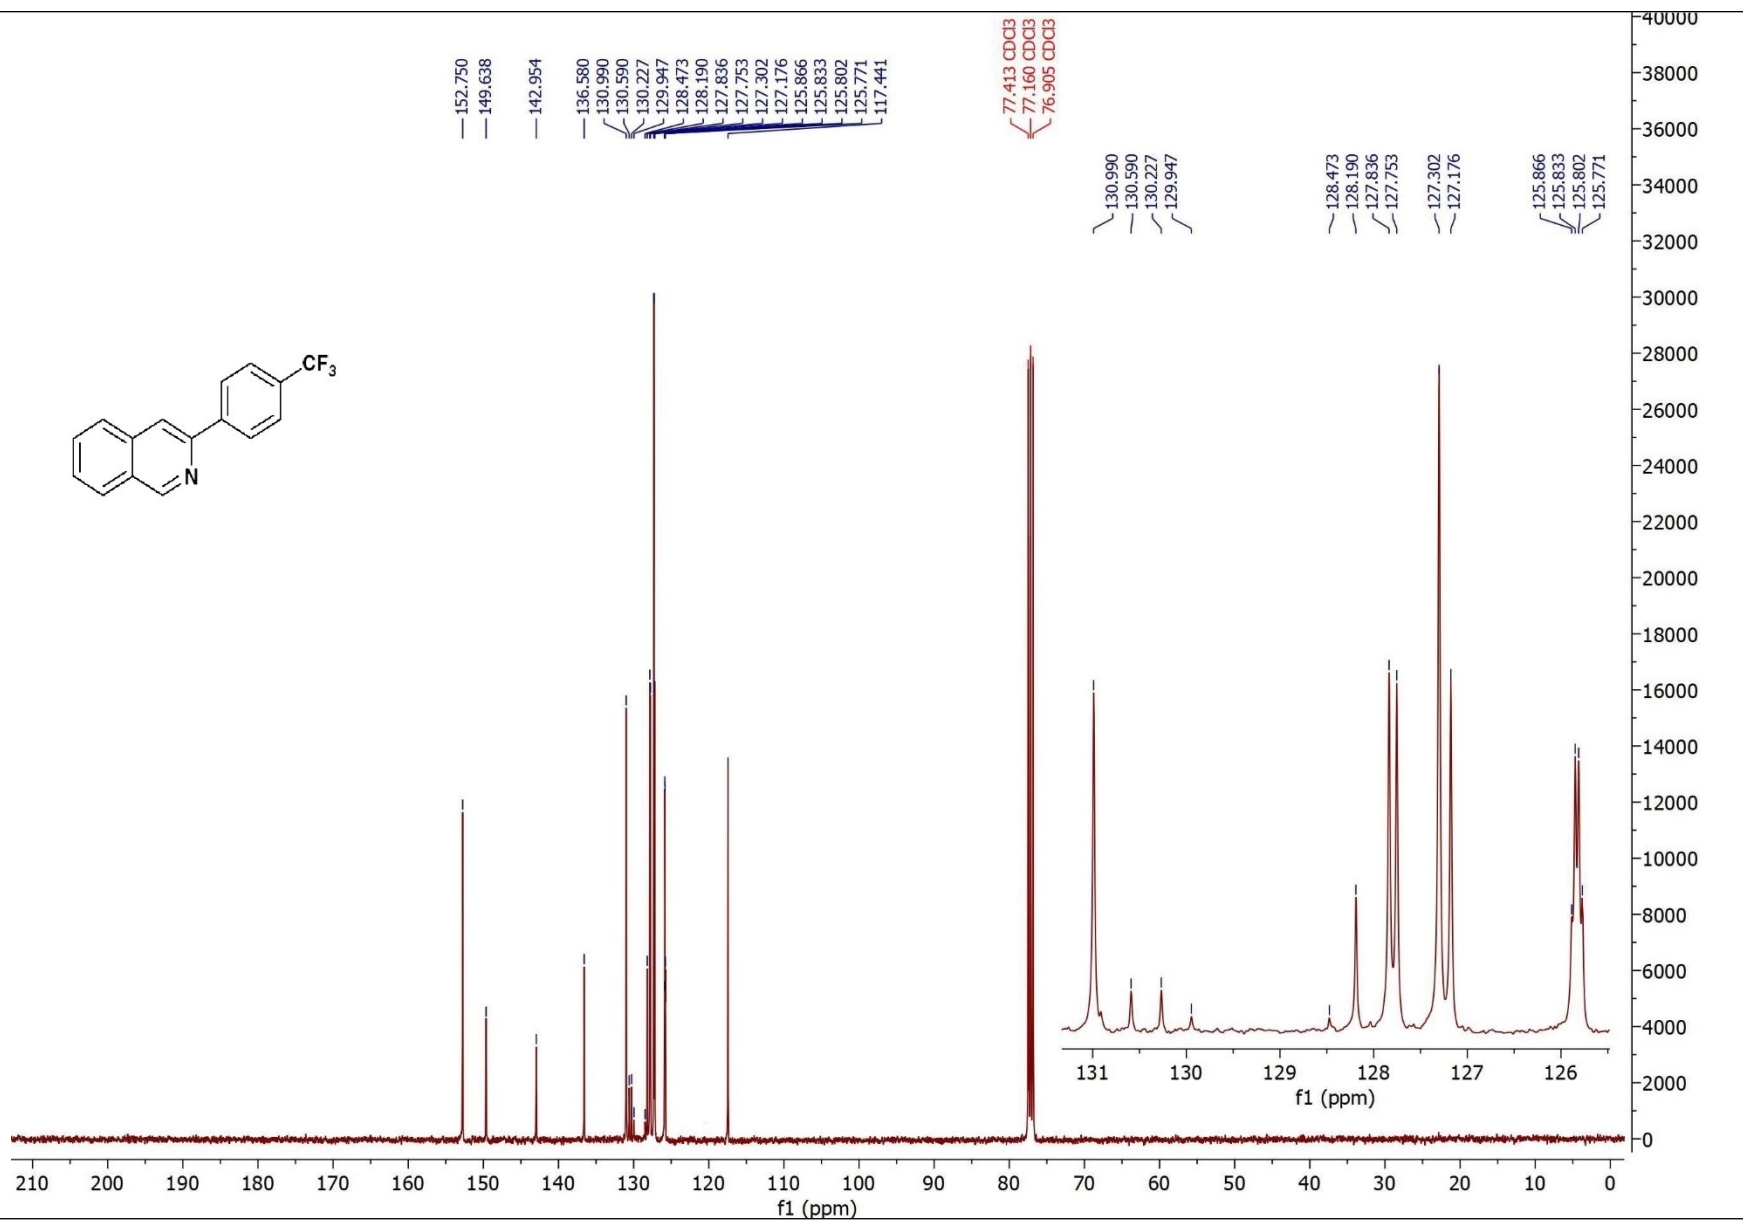

<sup>13</sup>C NMR (125 MHz, CDCl<sub>3</sub>): 3-(4-(Trifluoromethyl)phenyl)isoquinoline (3h)

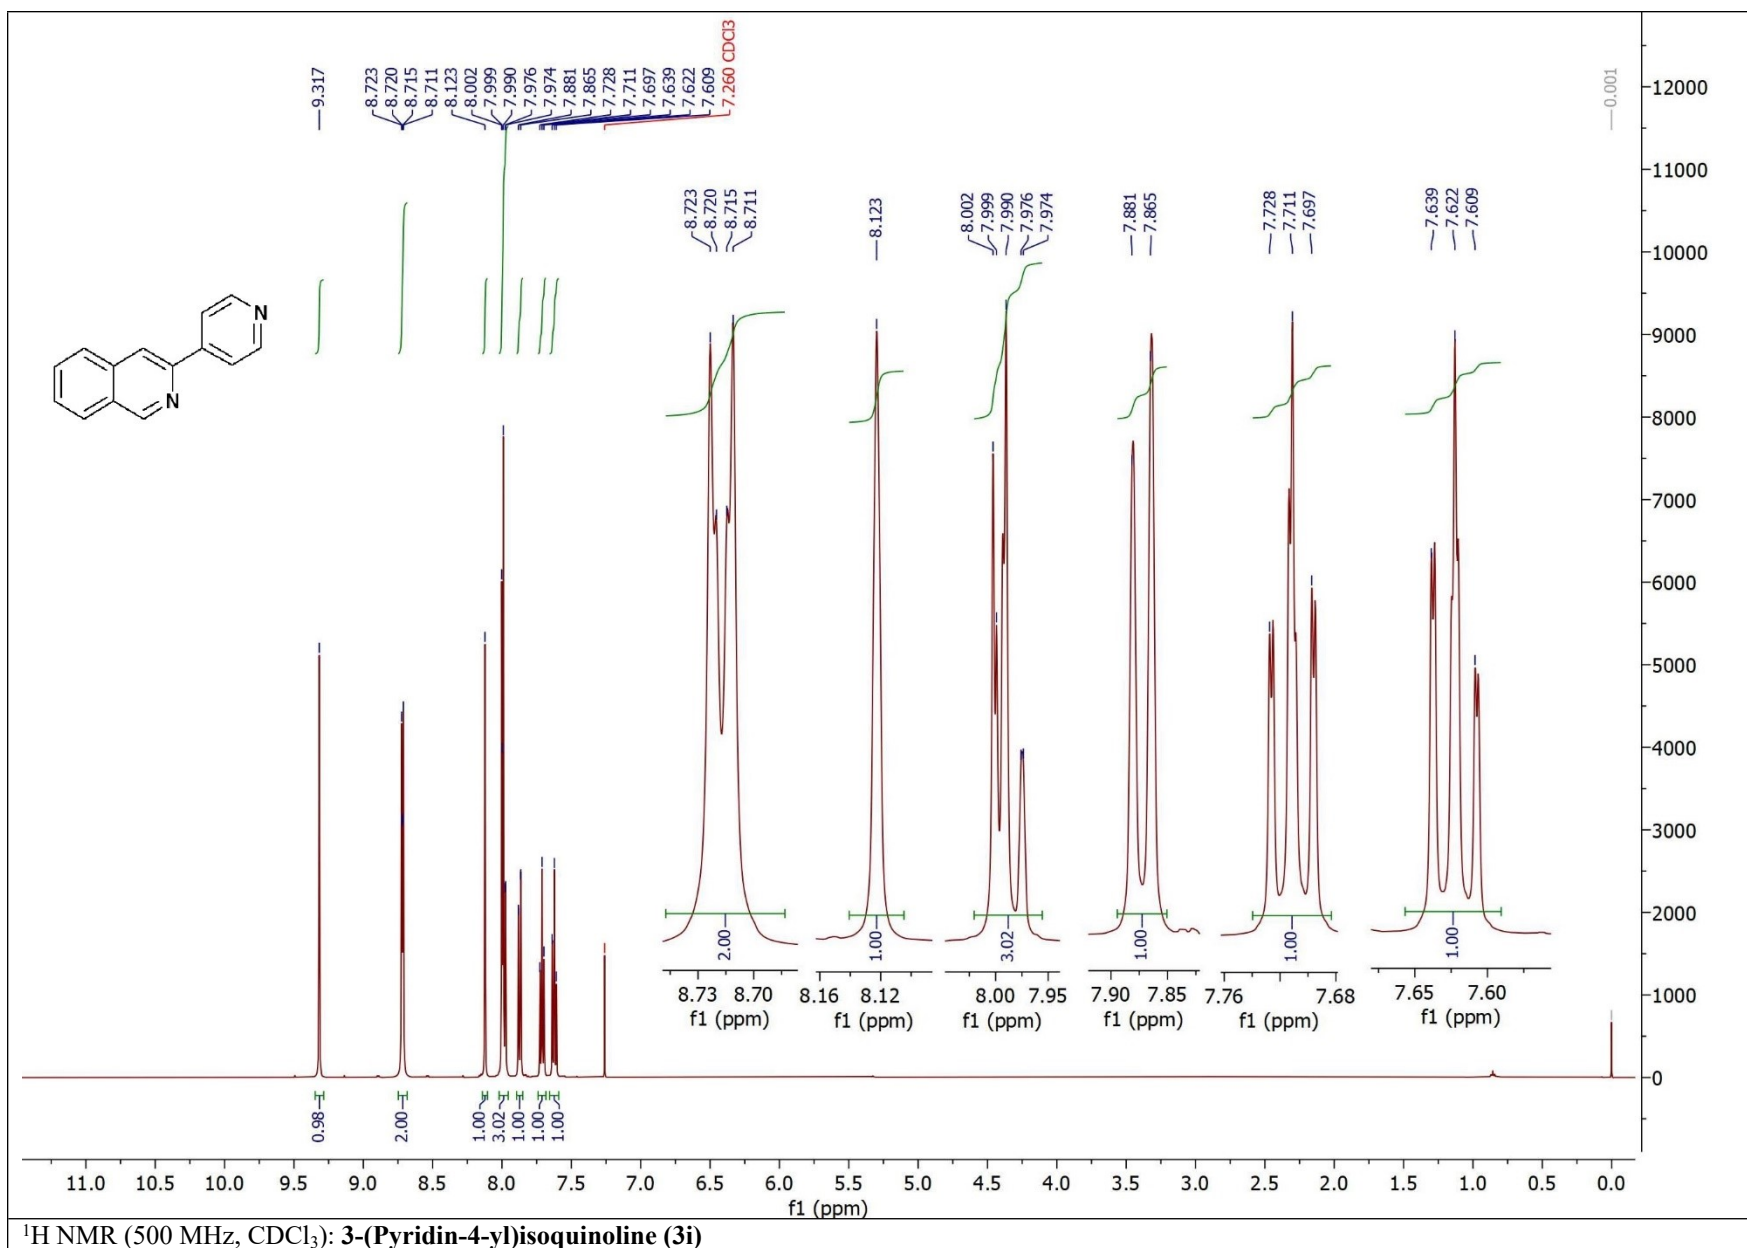

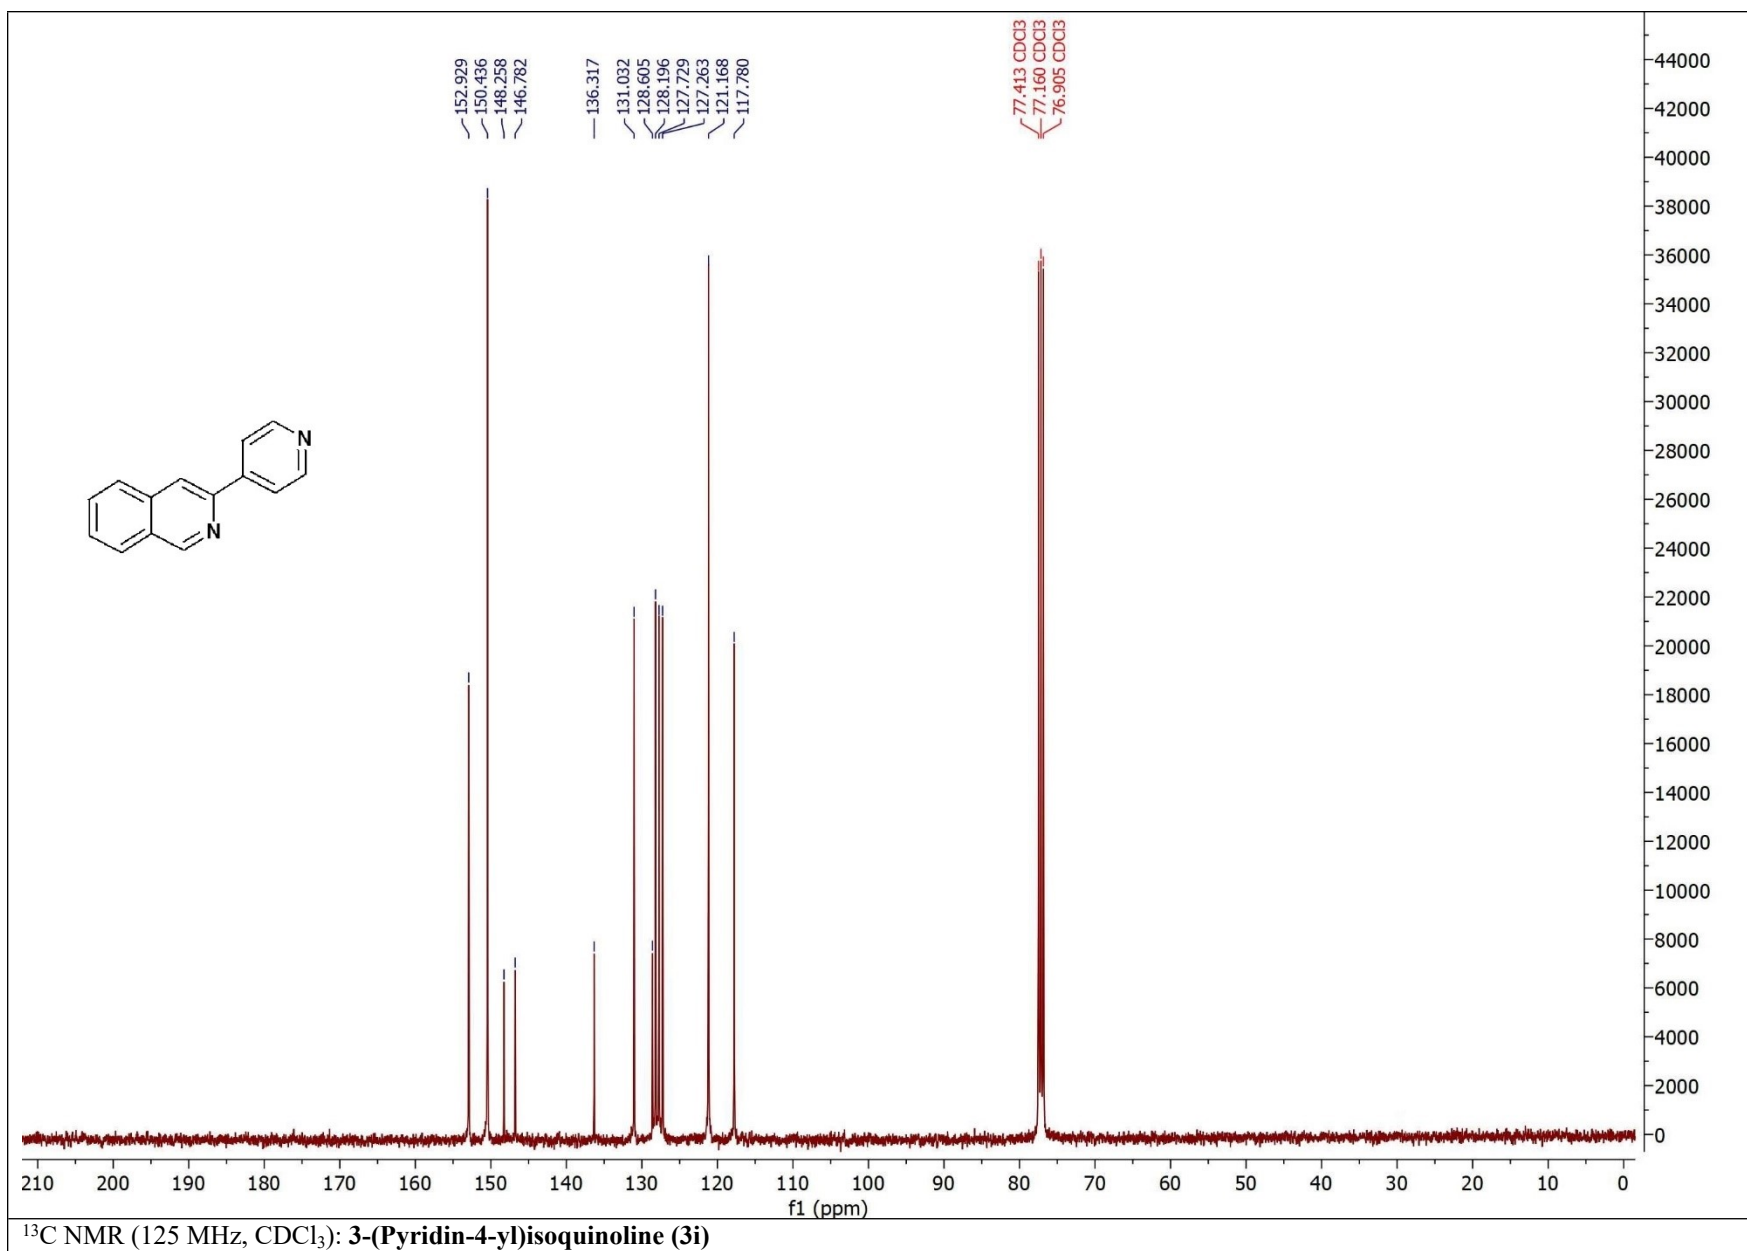

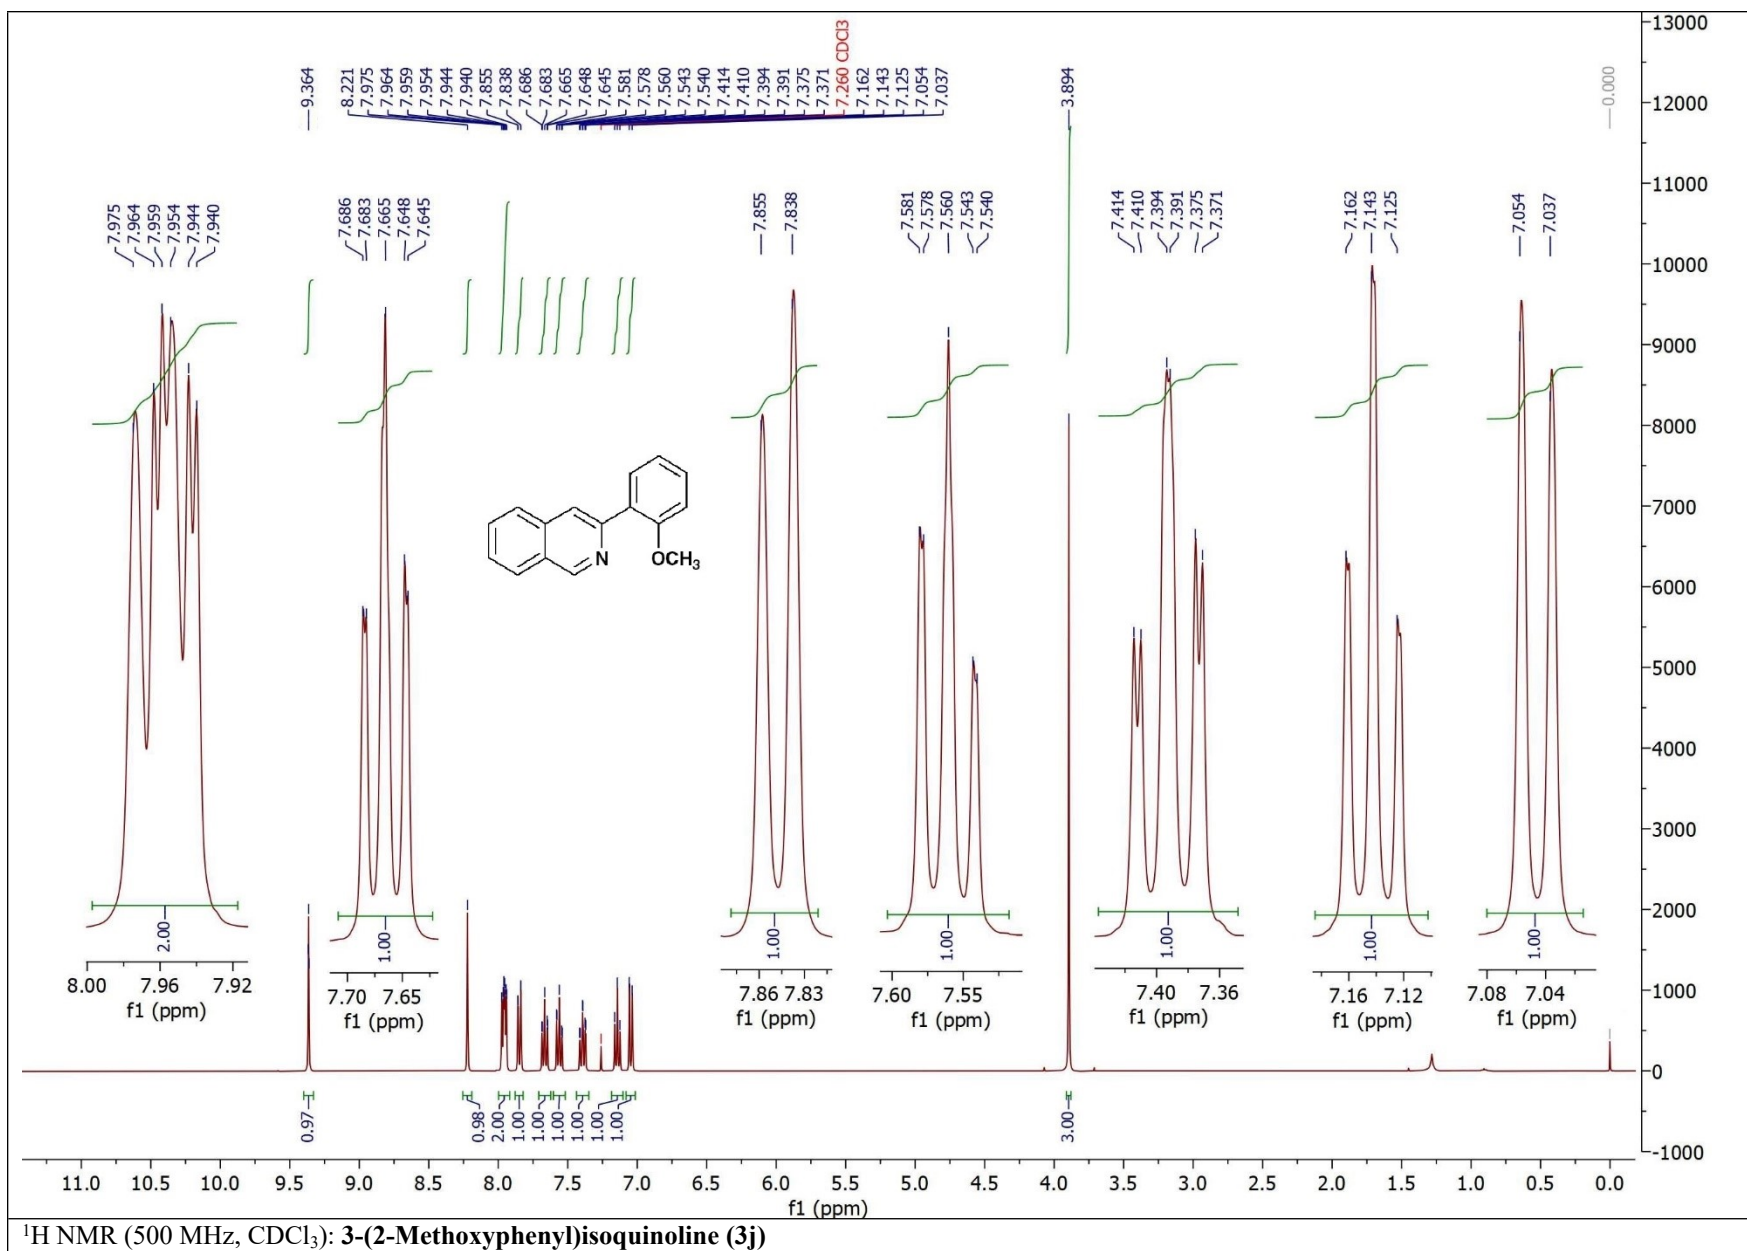

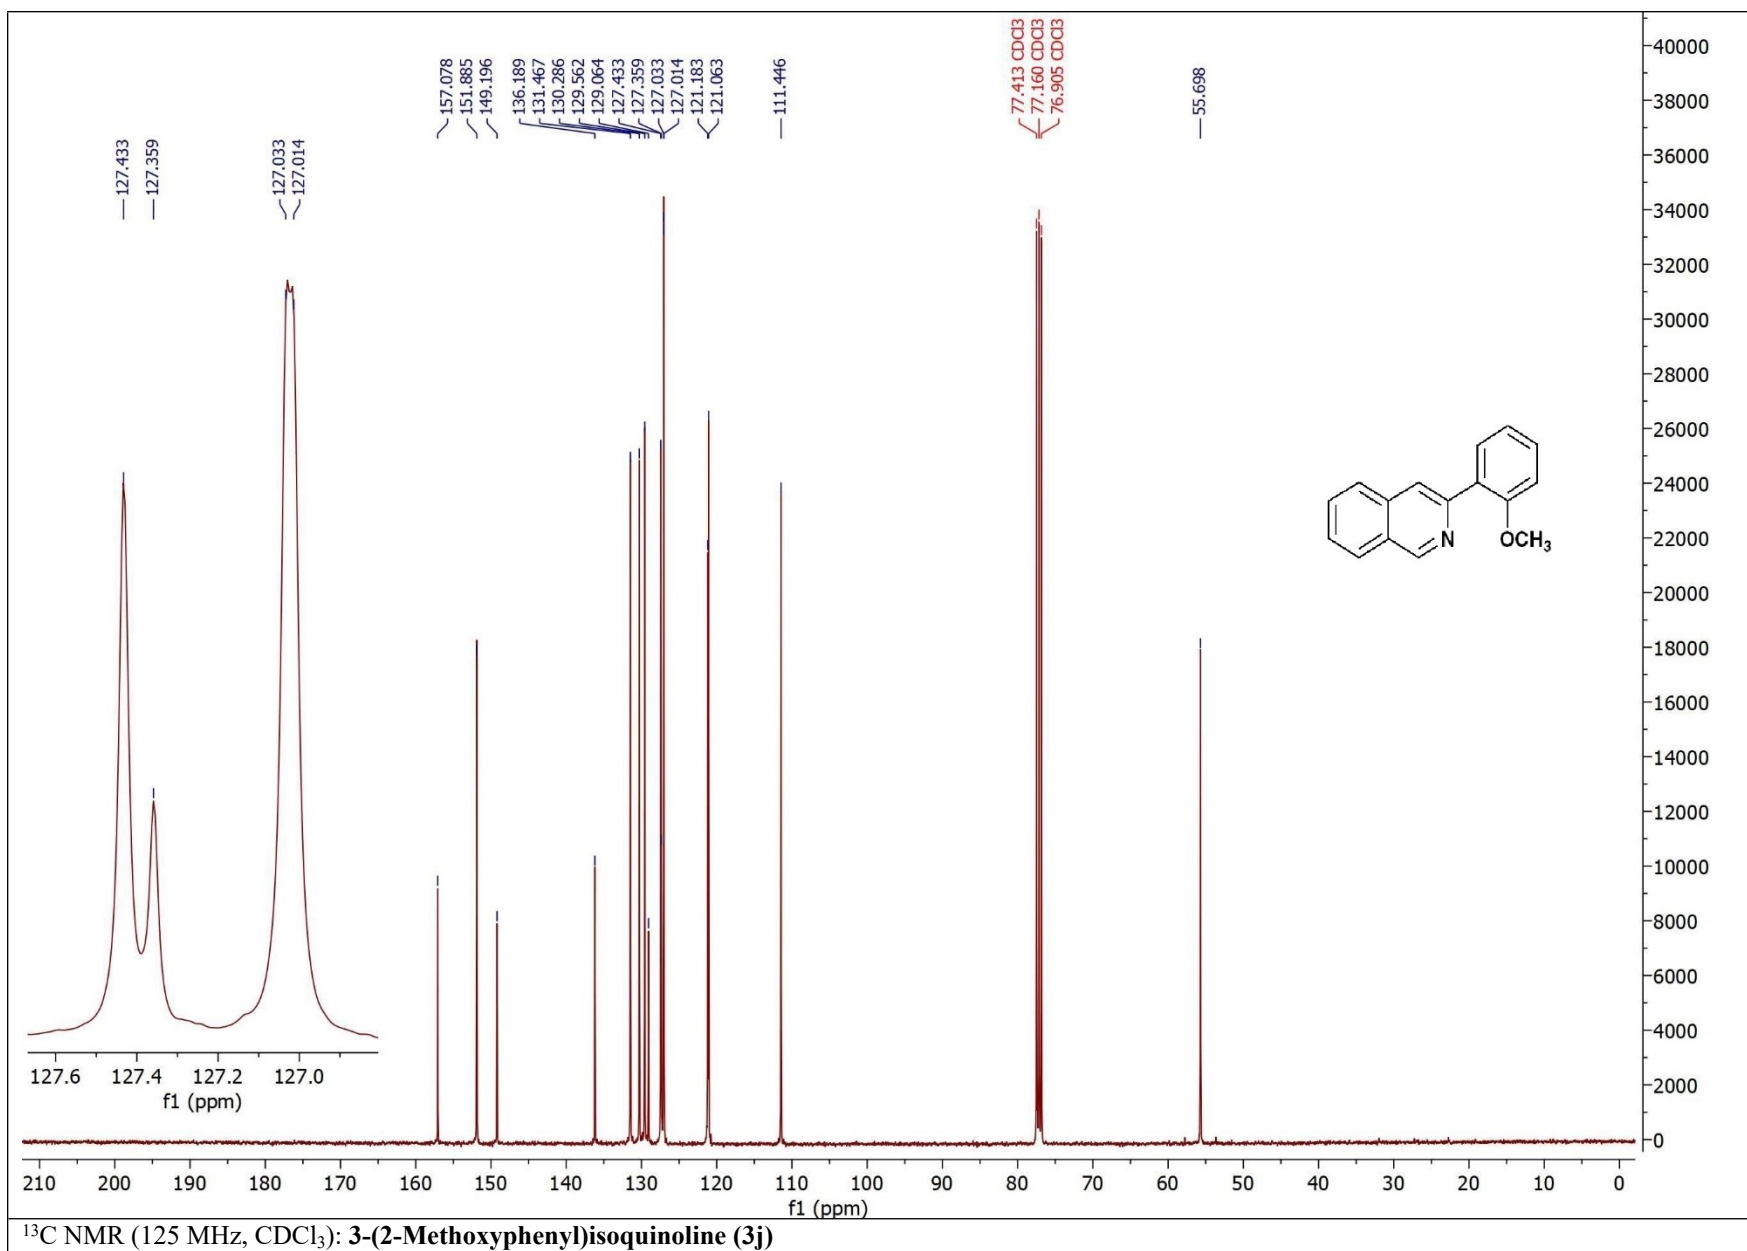

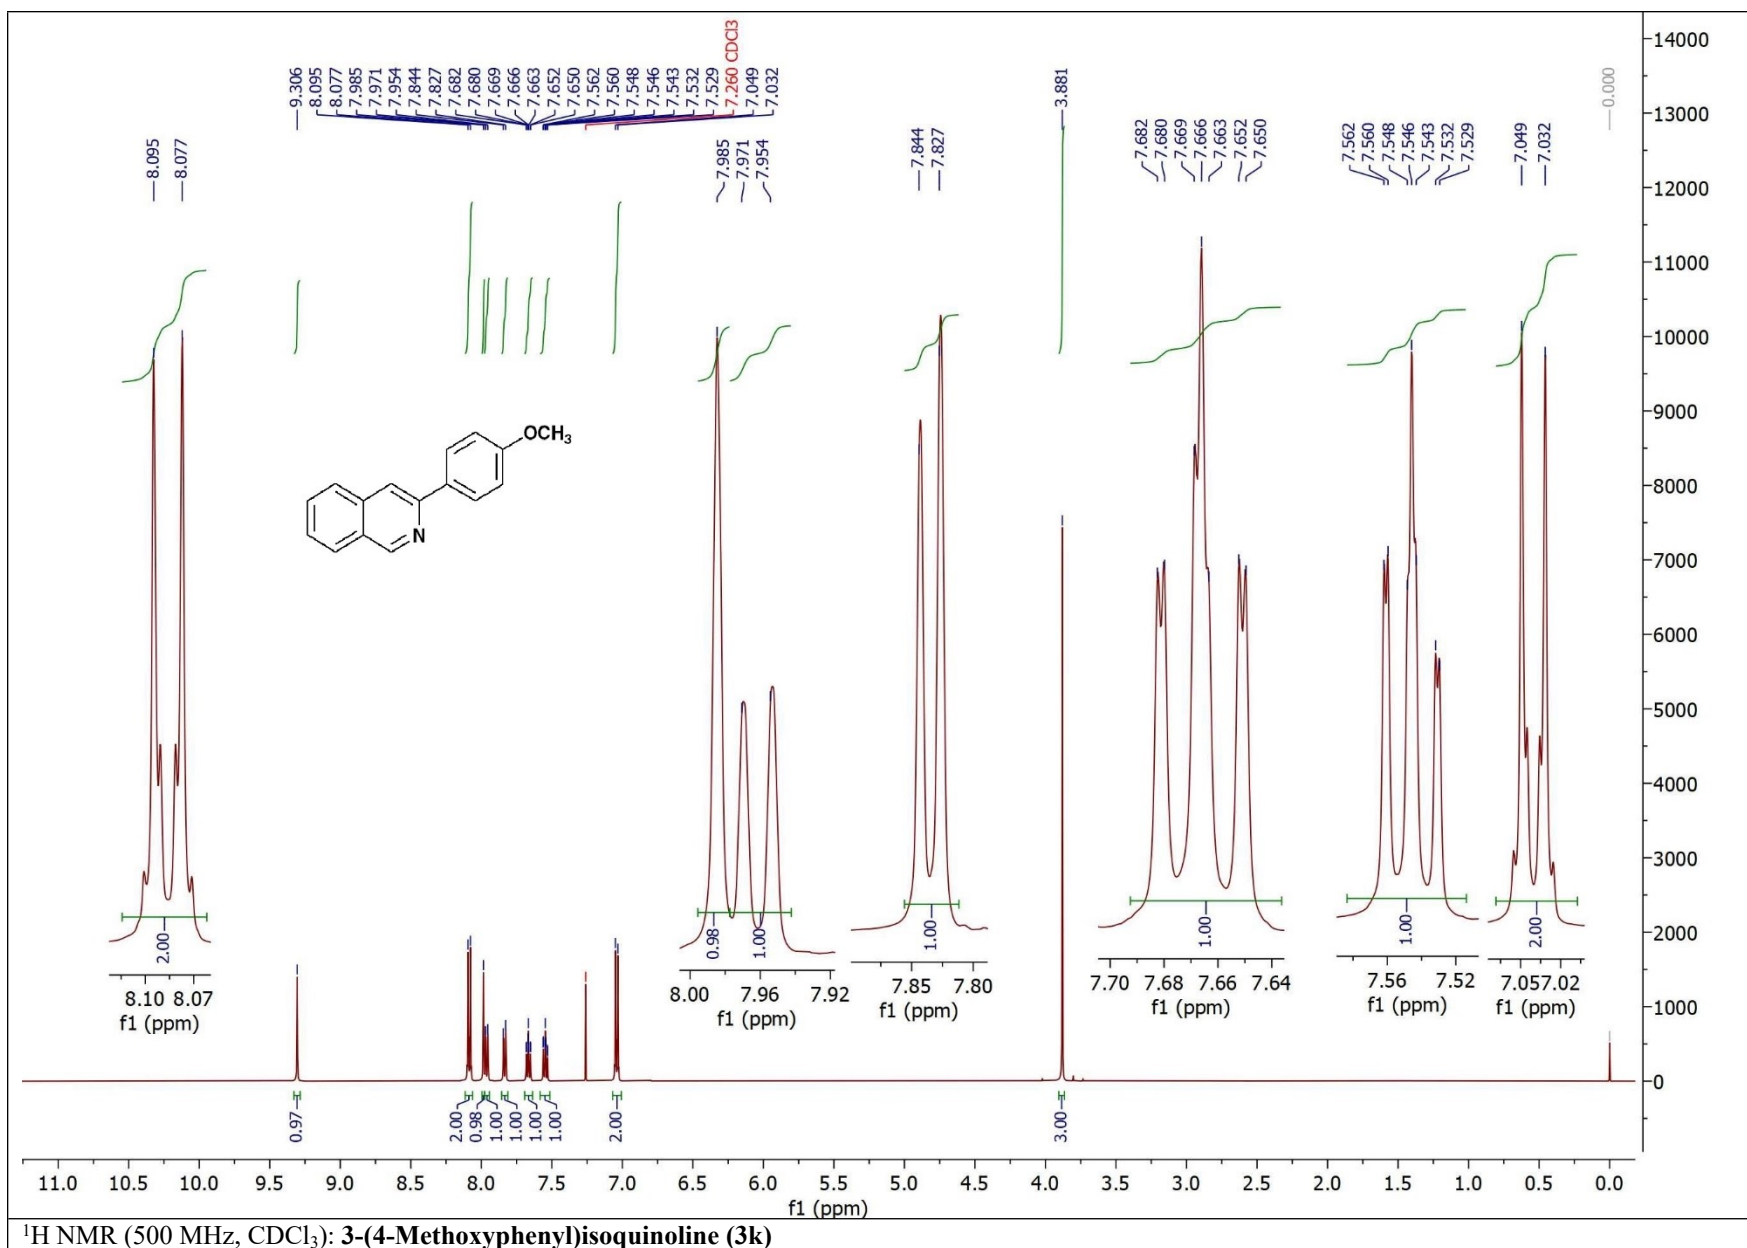

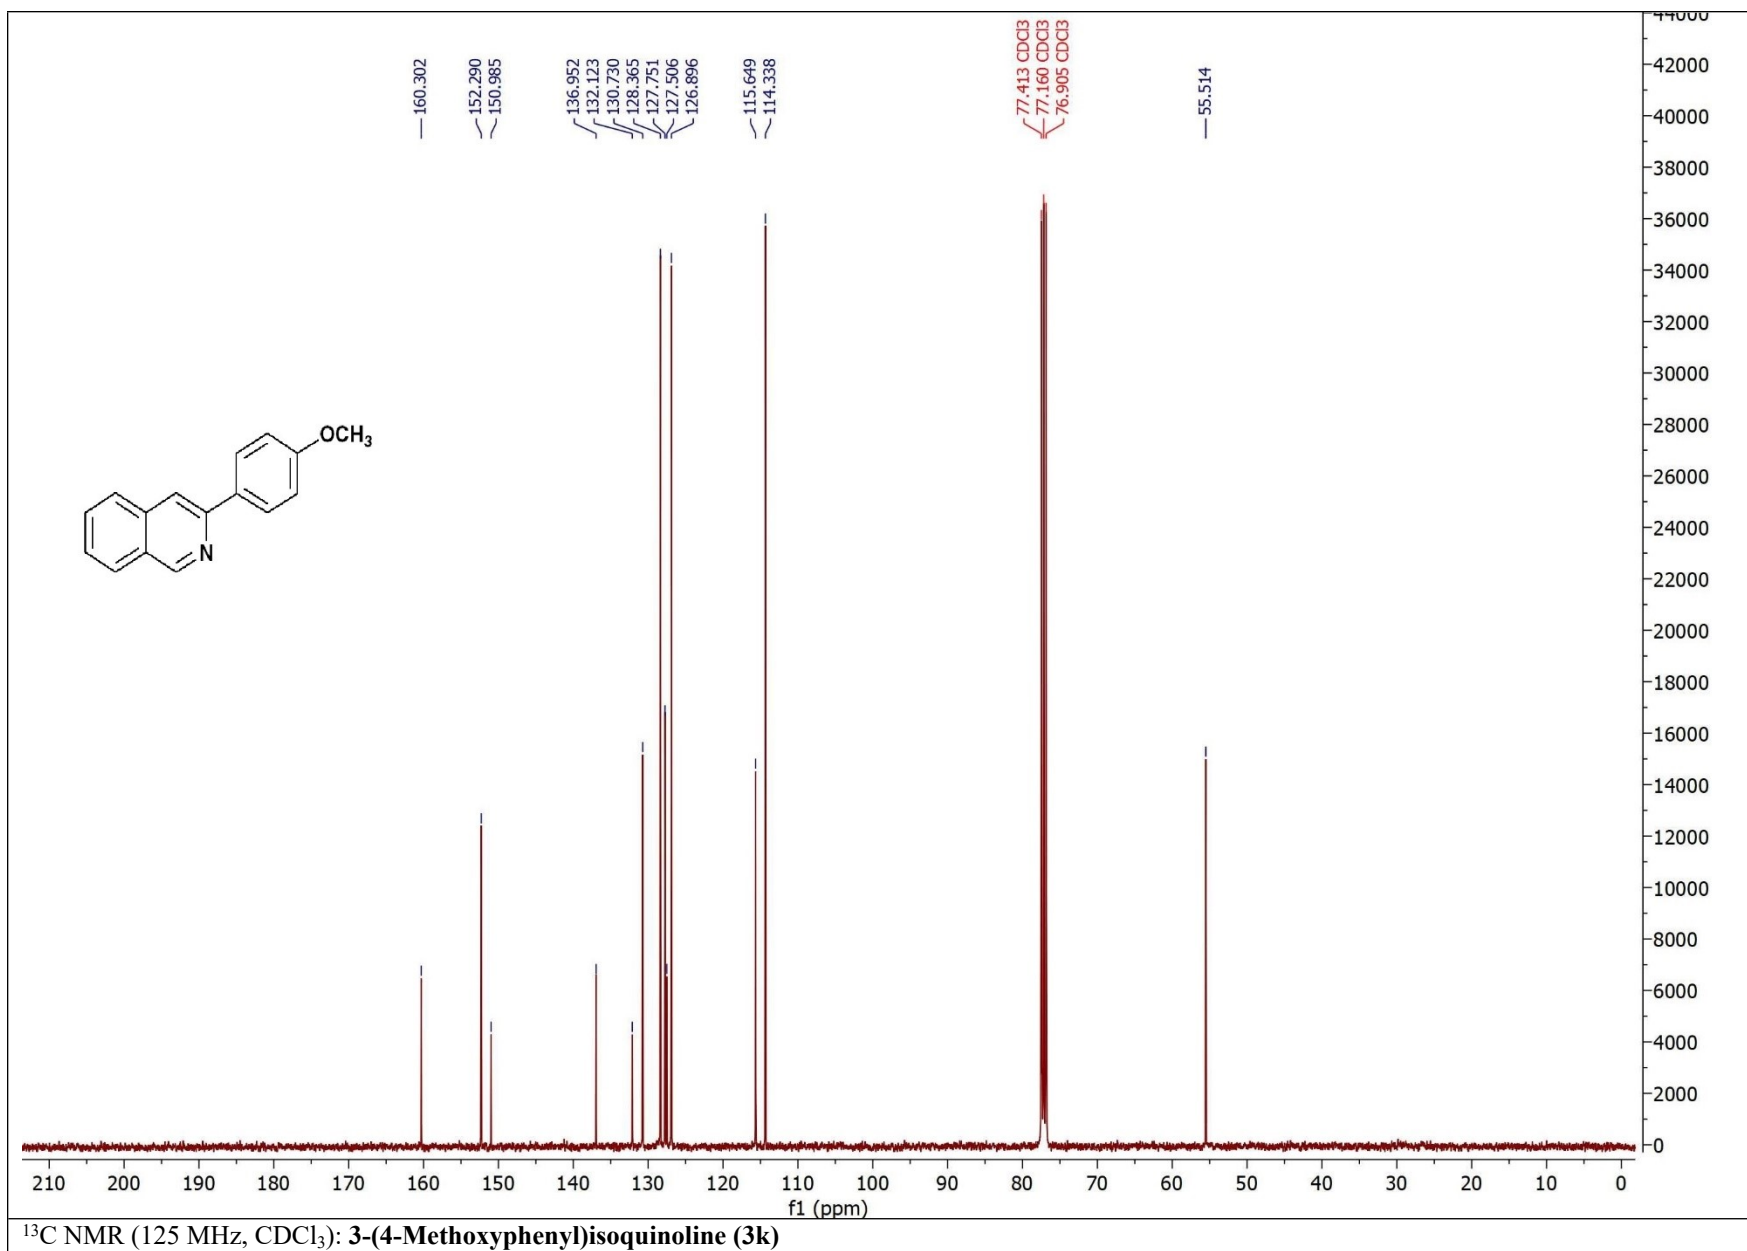

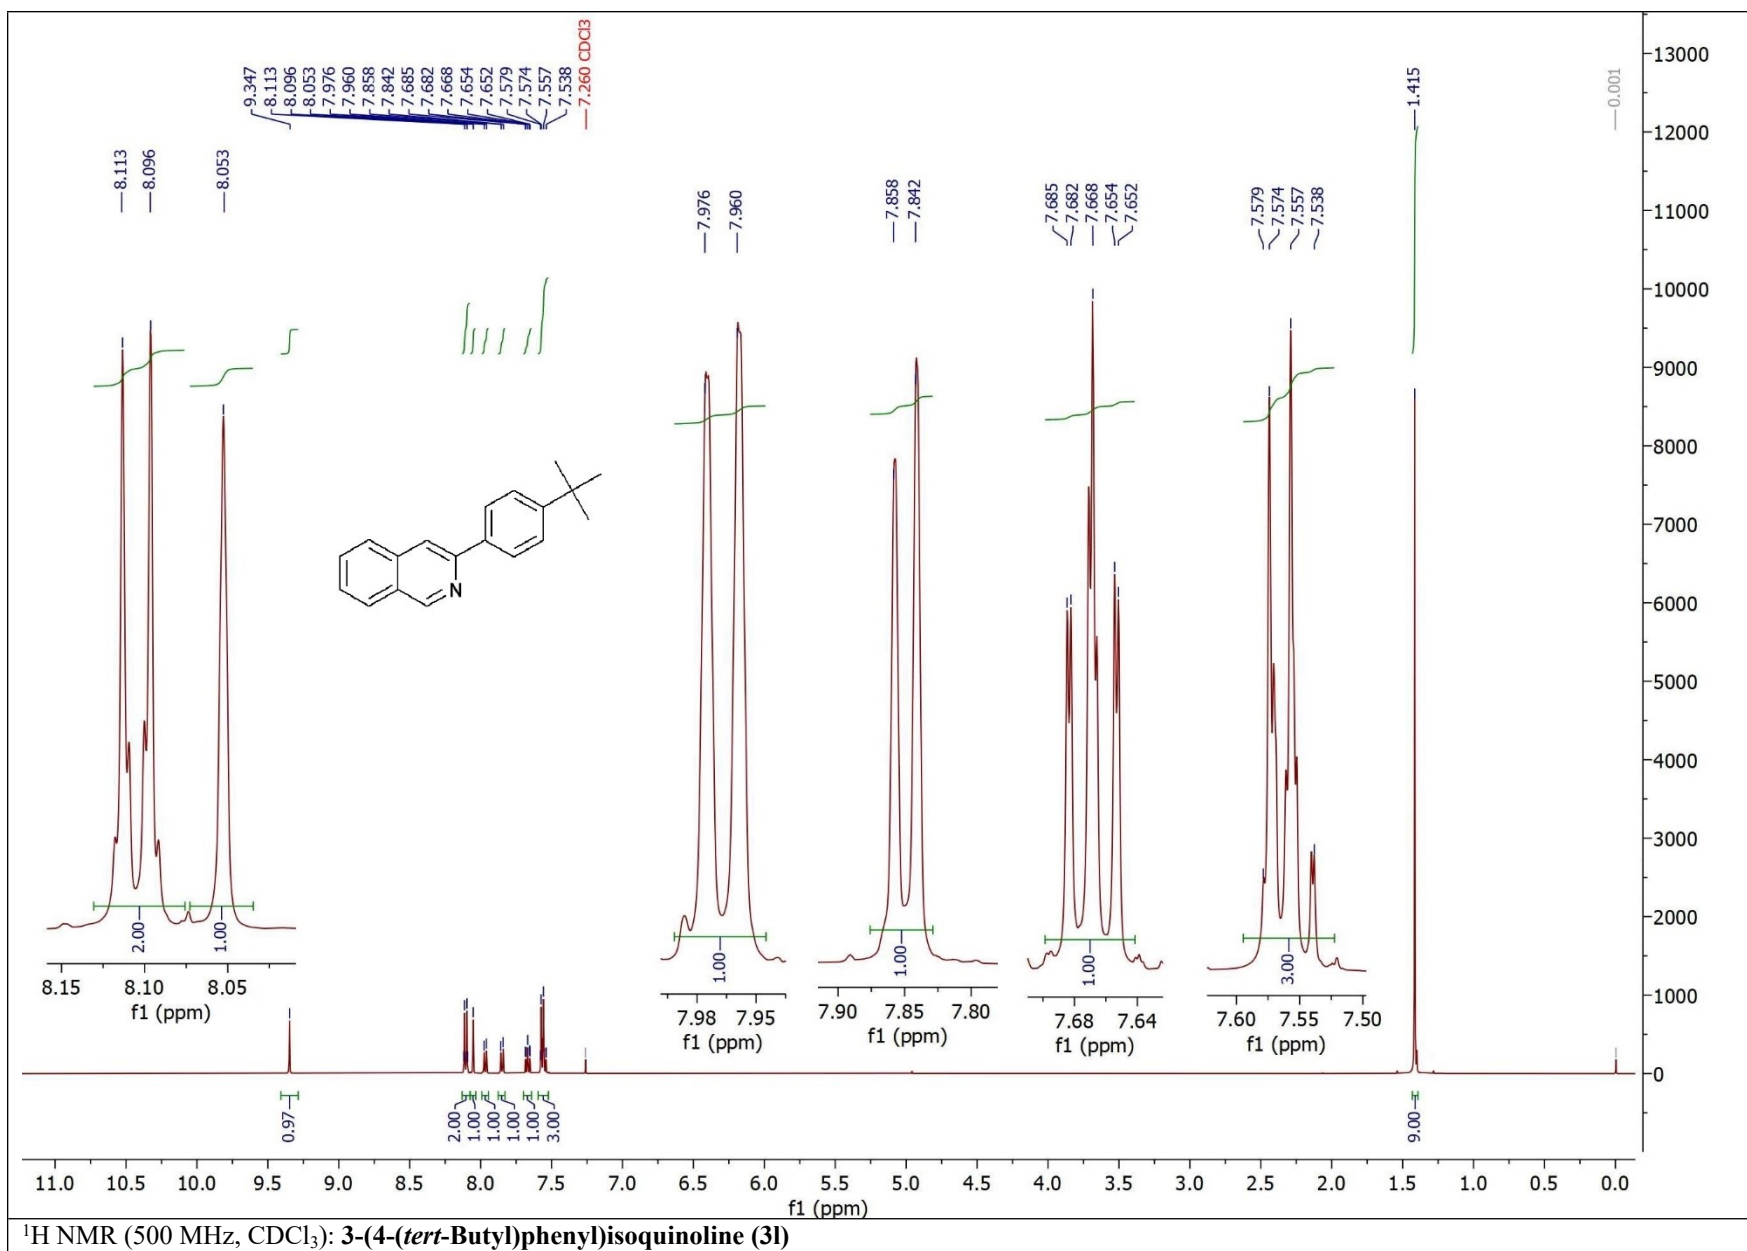

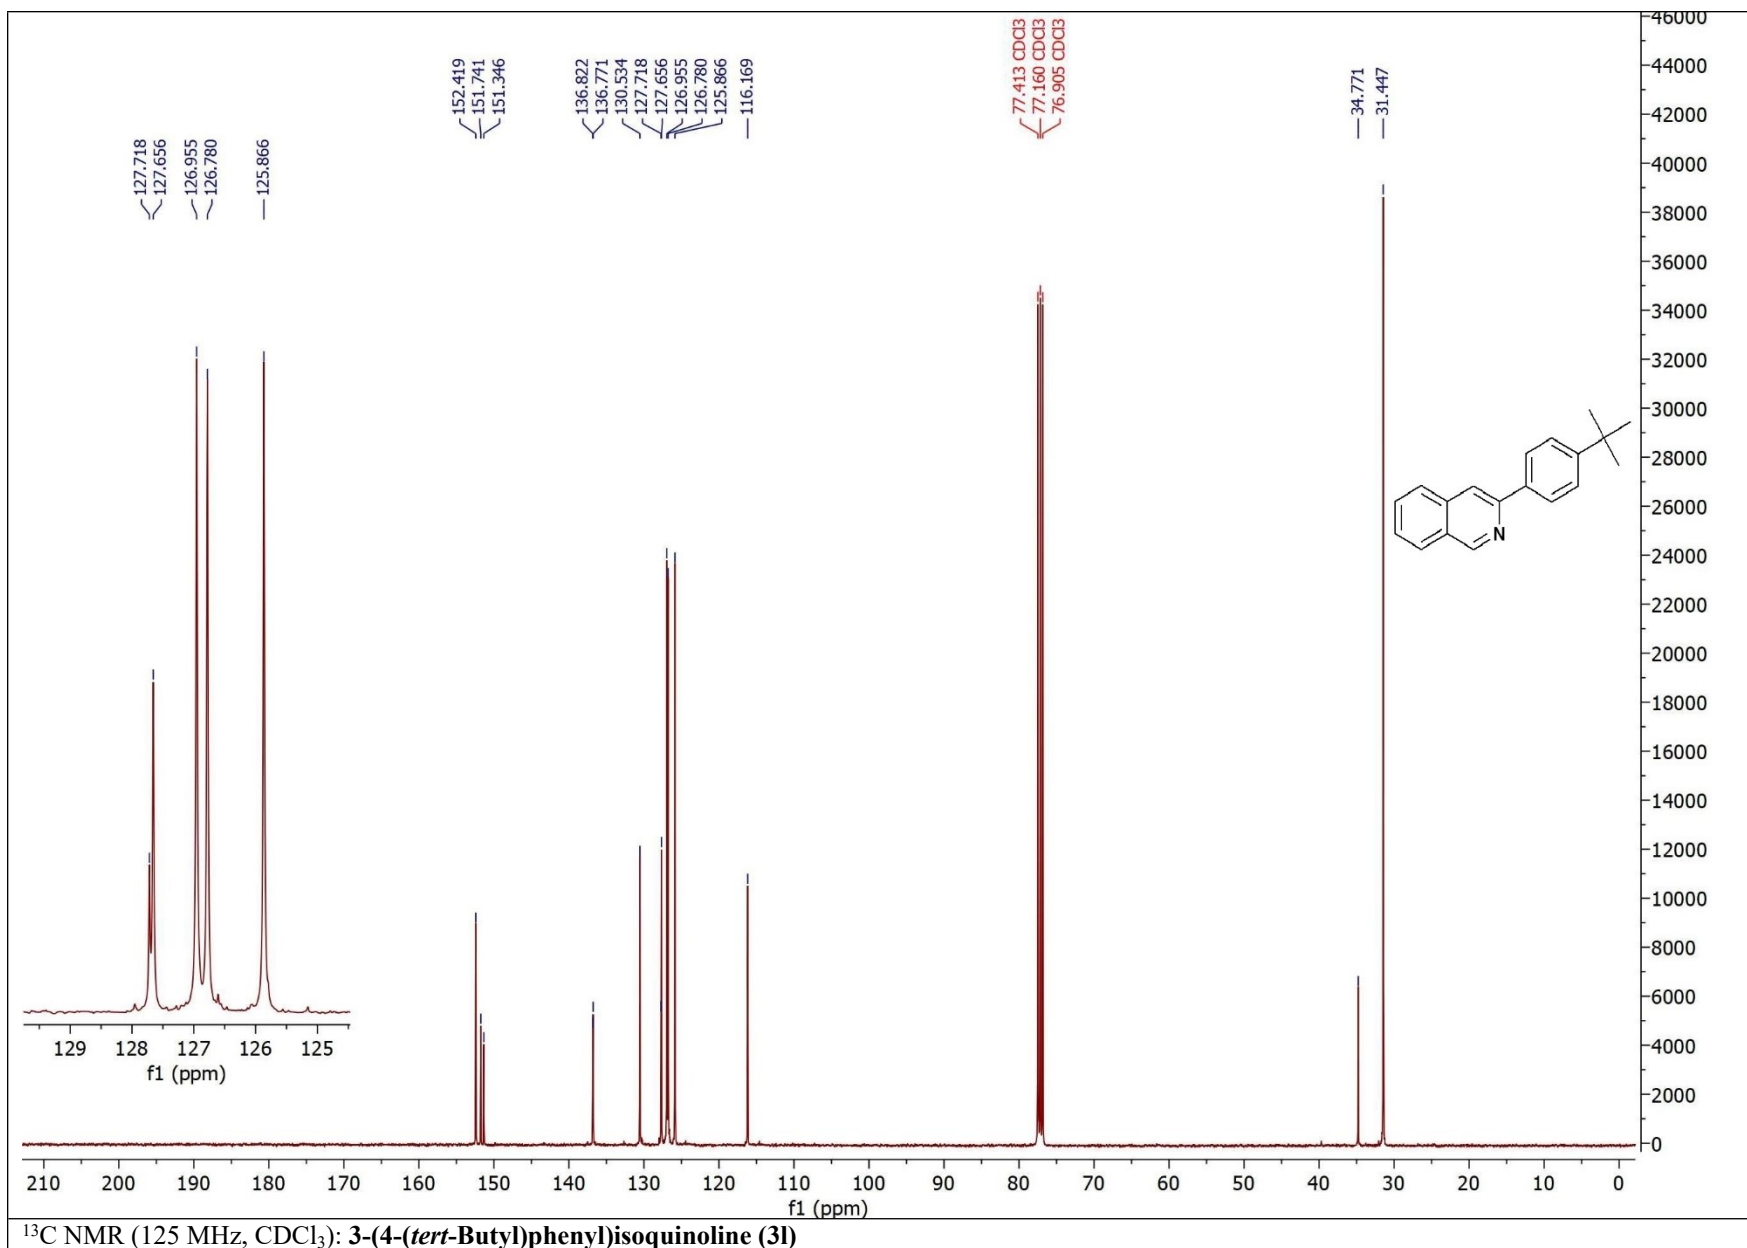

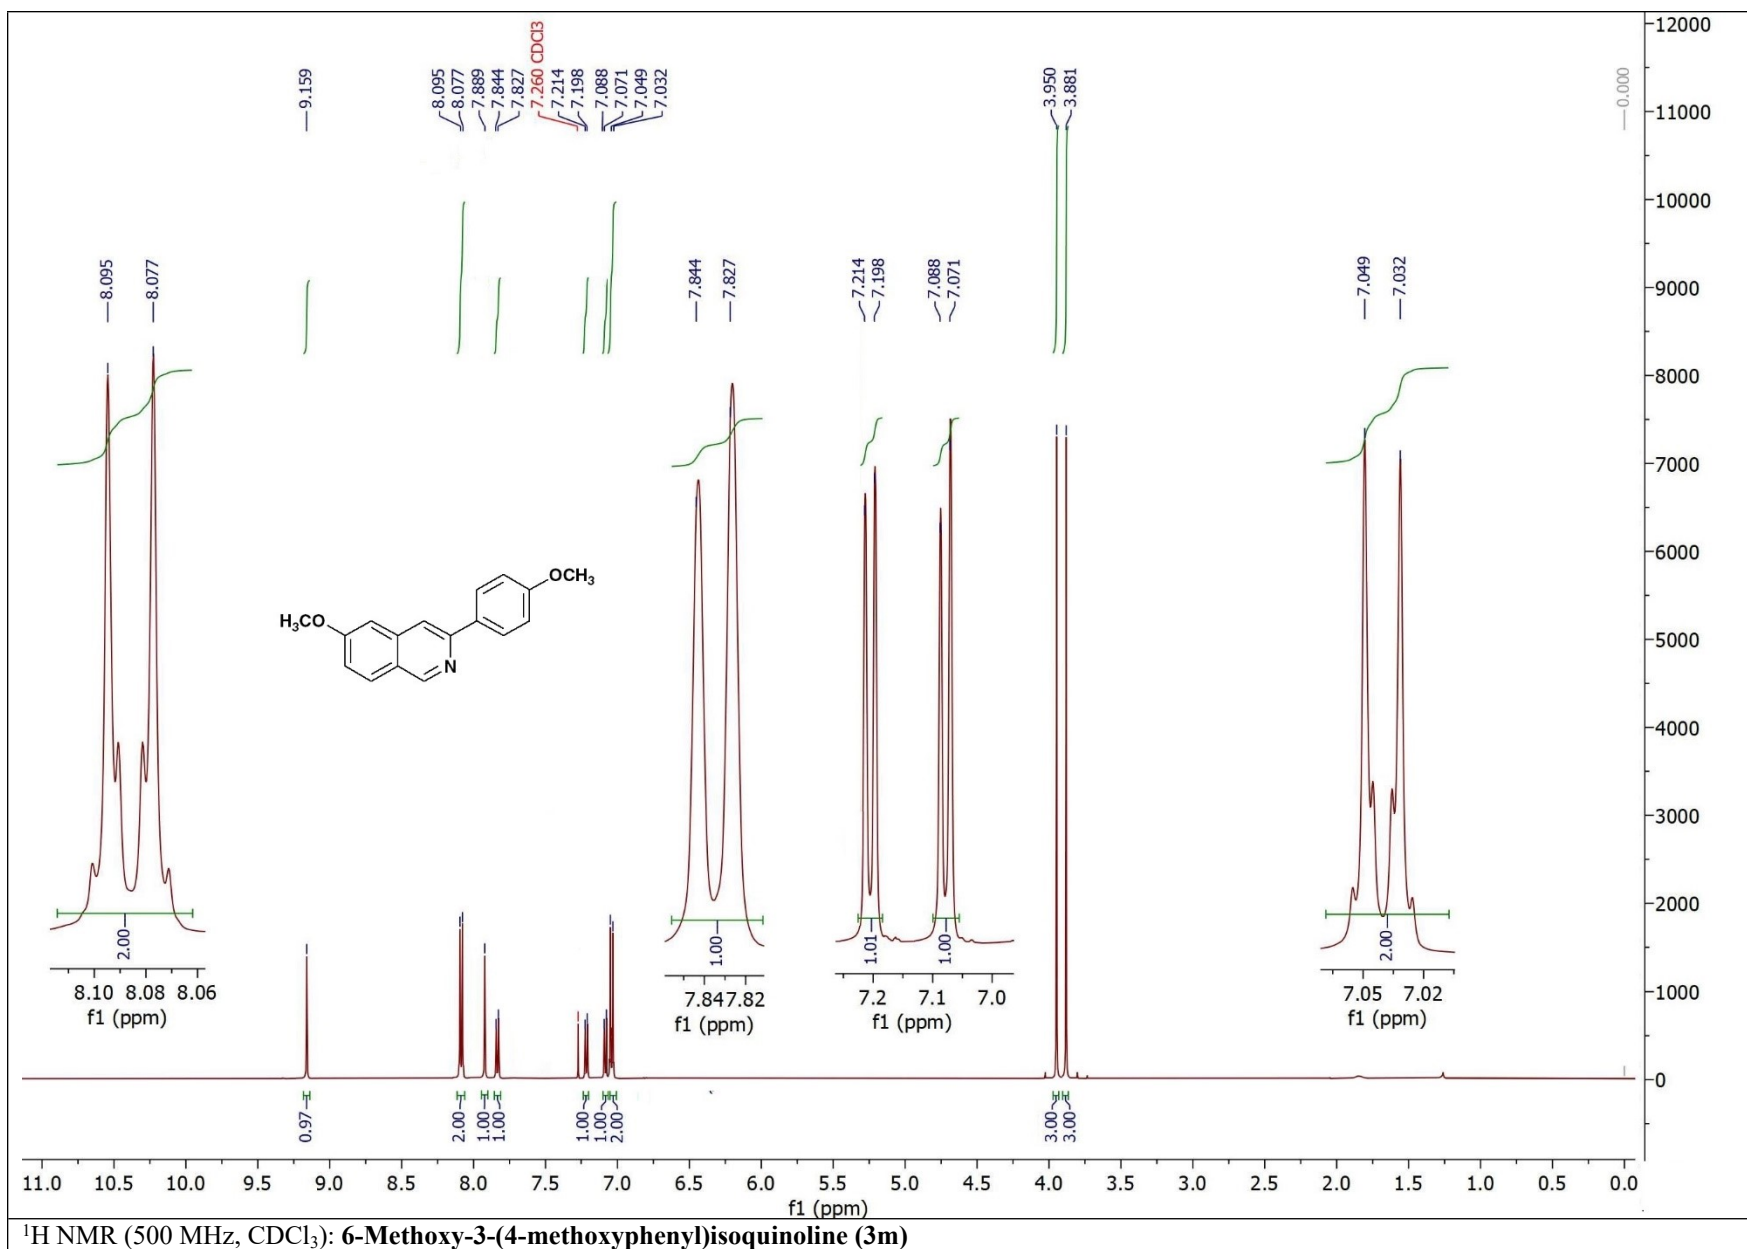

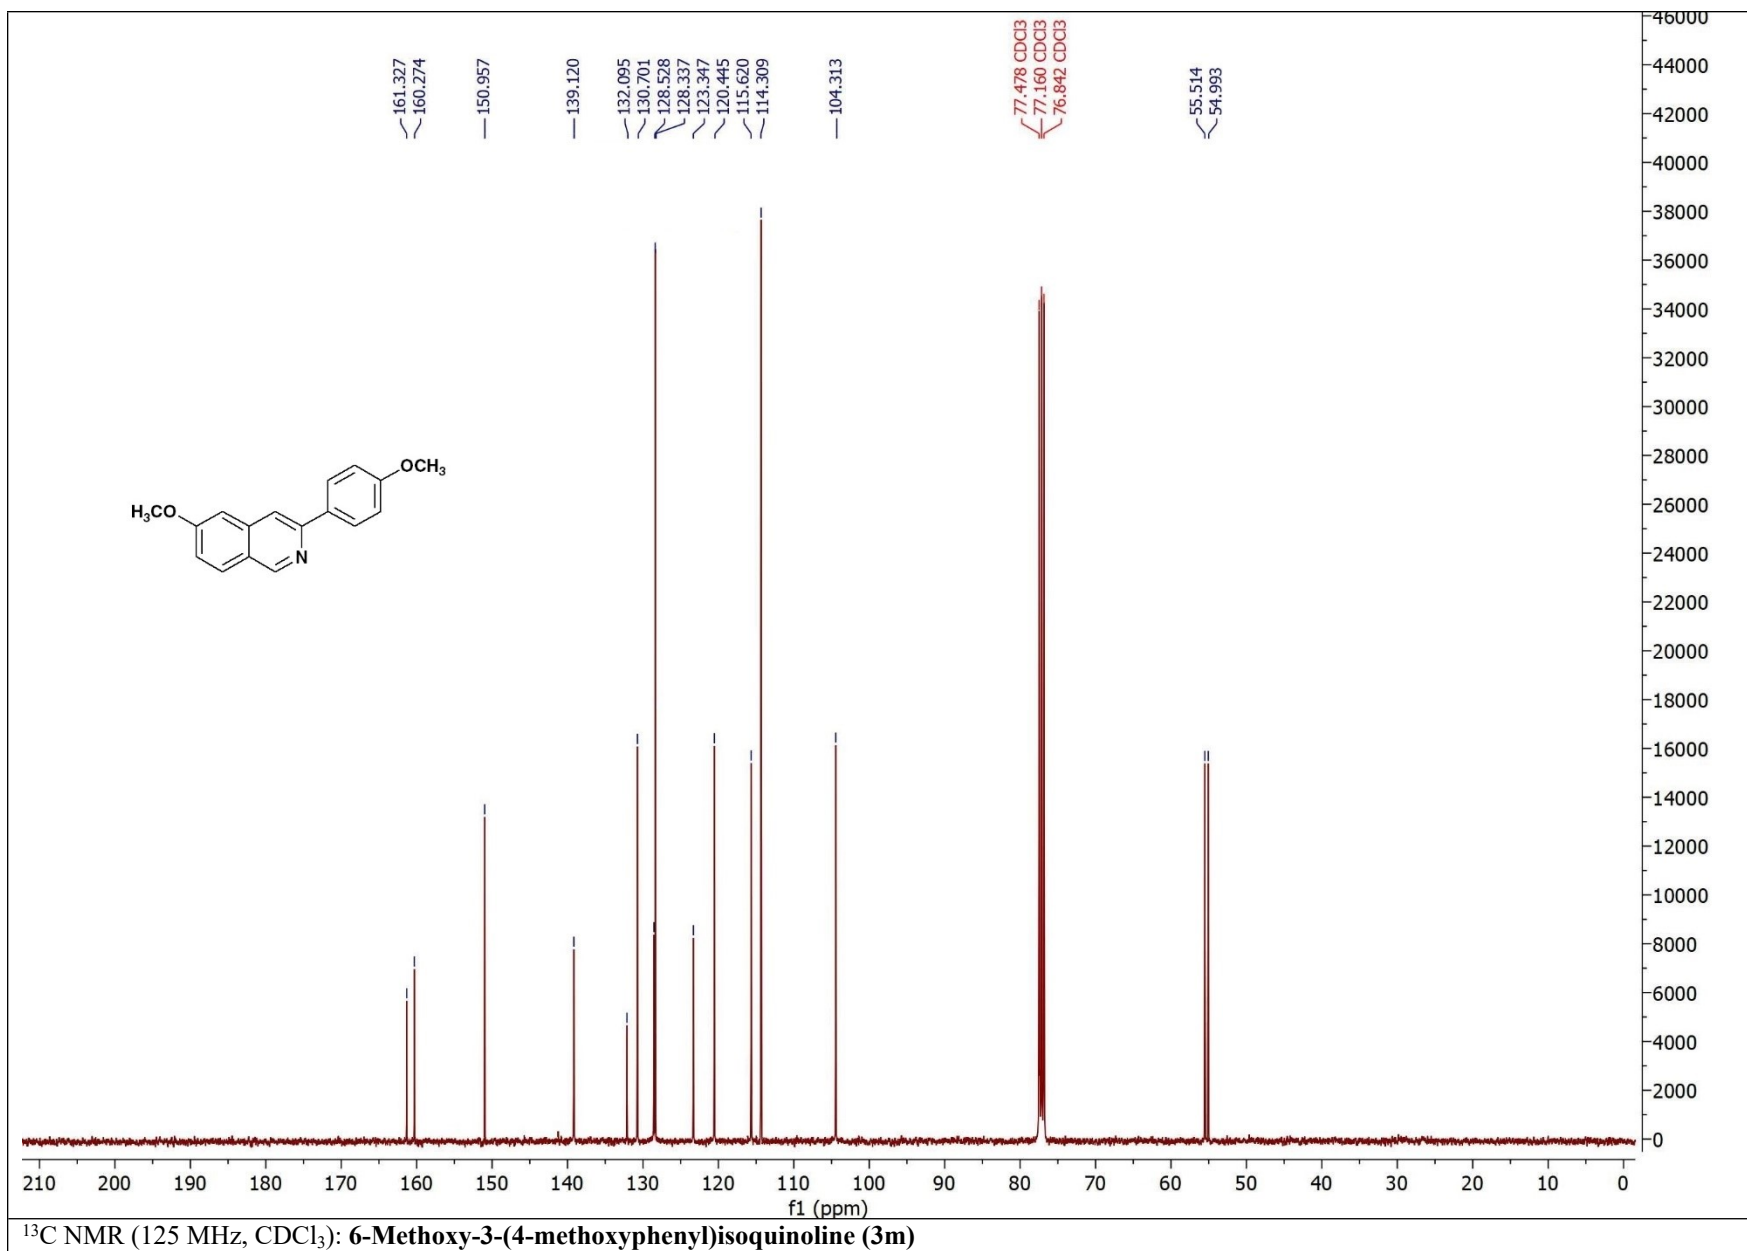

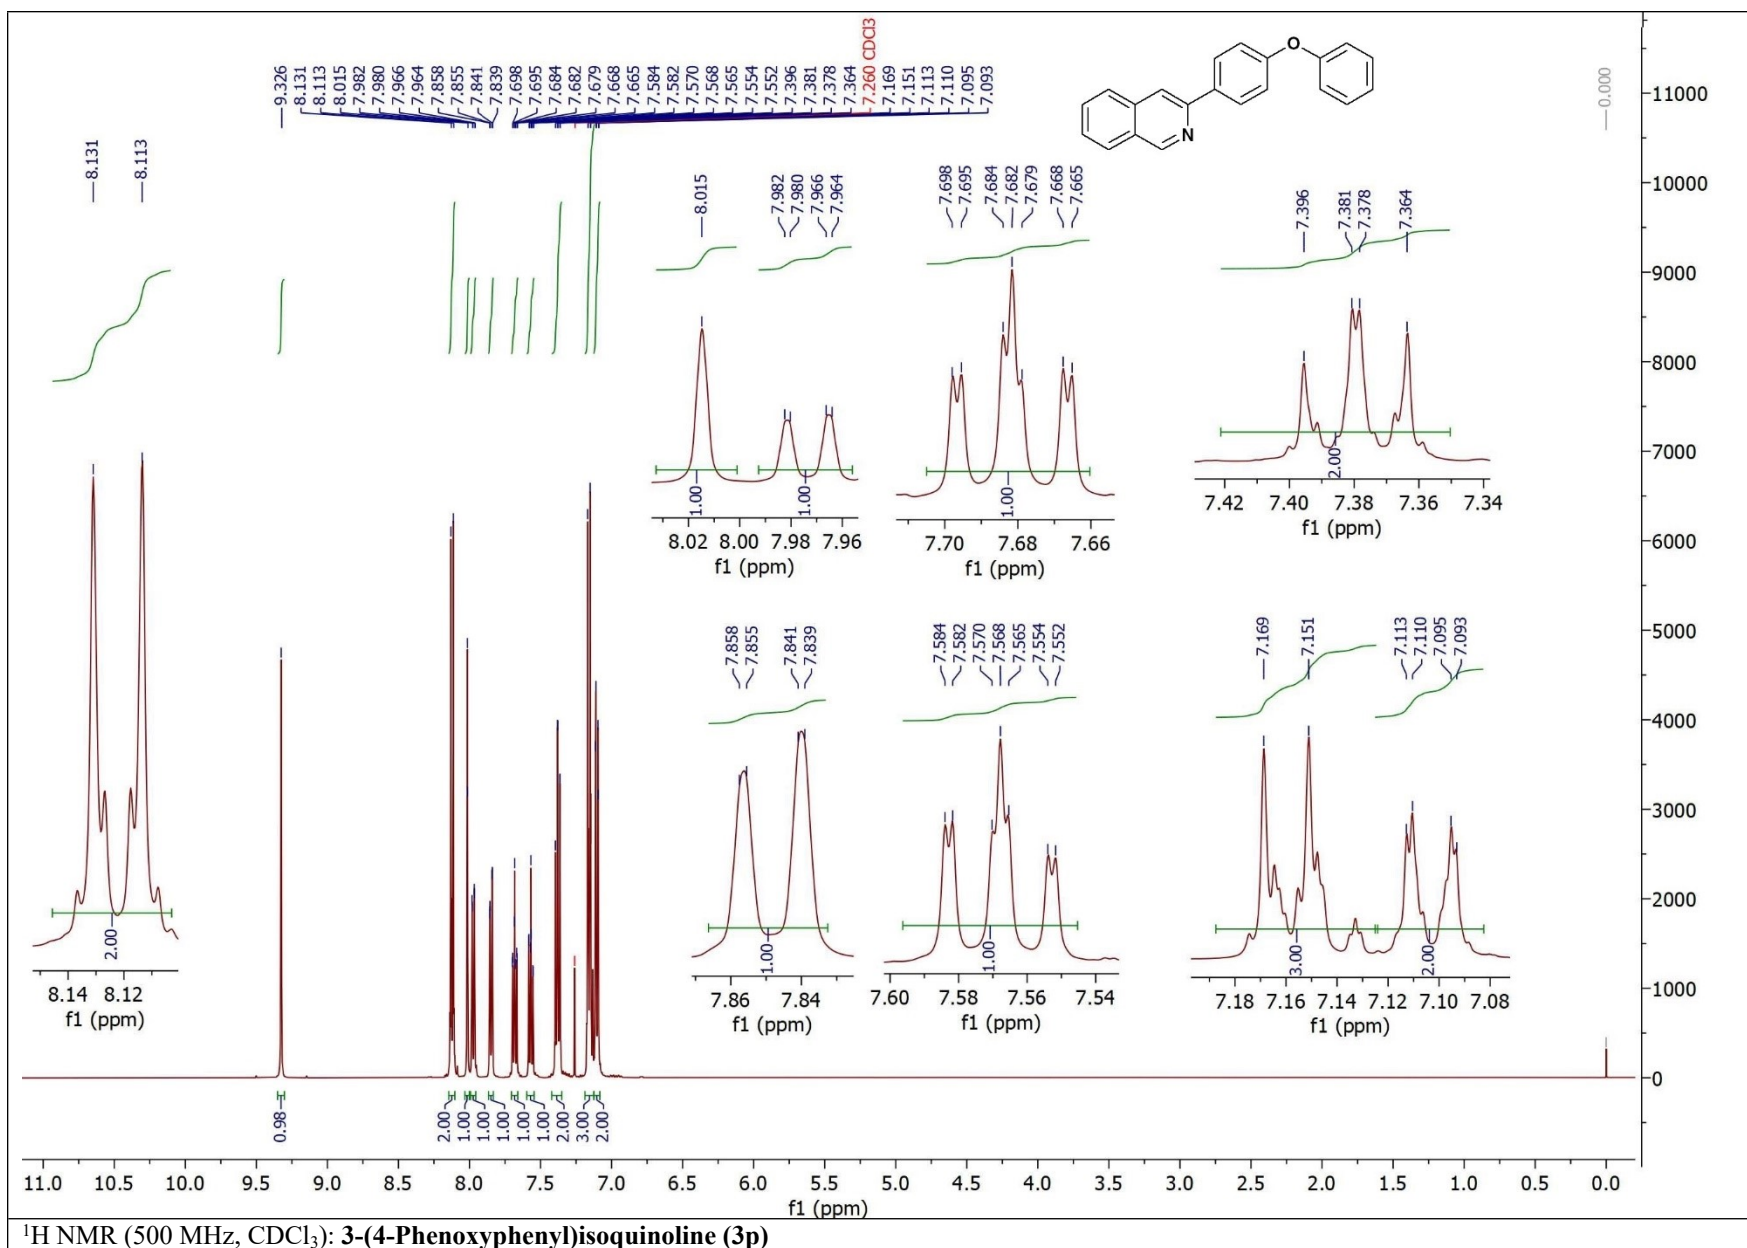

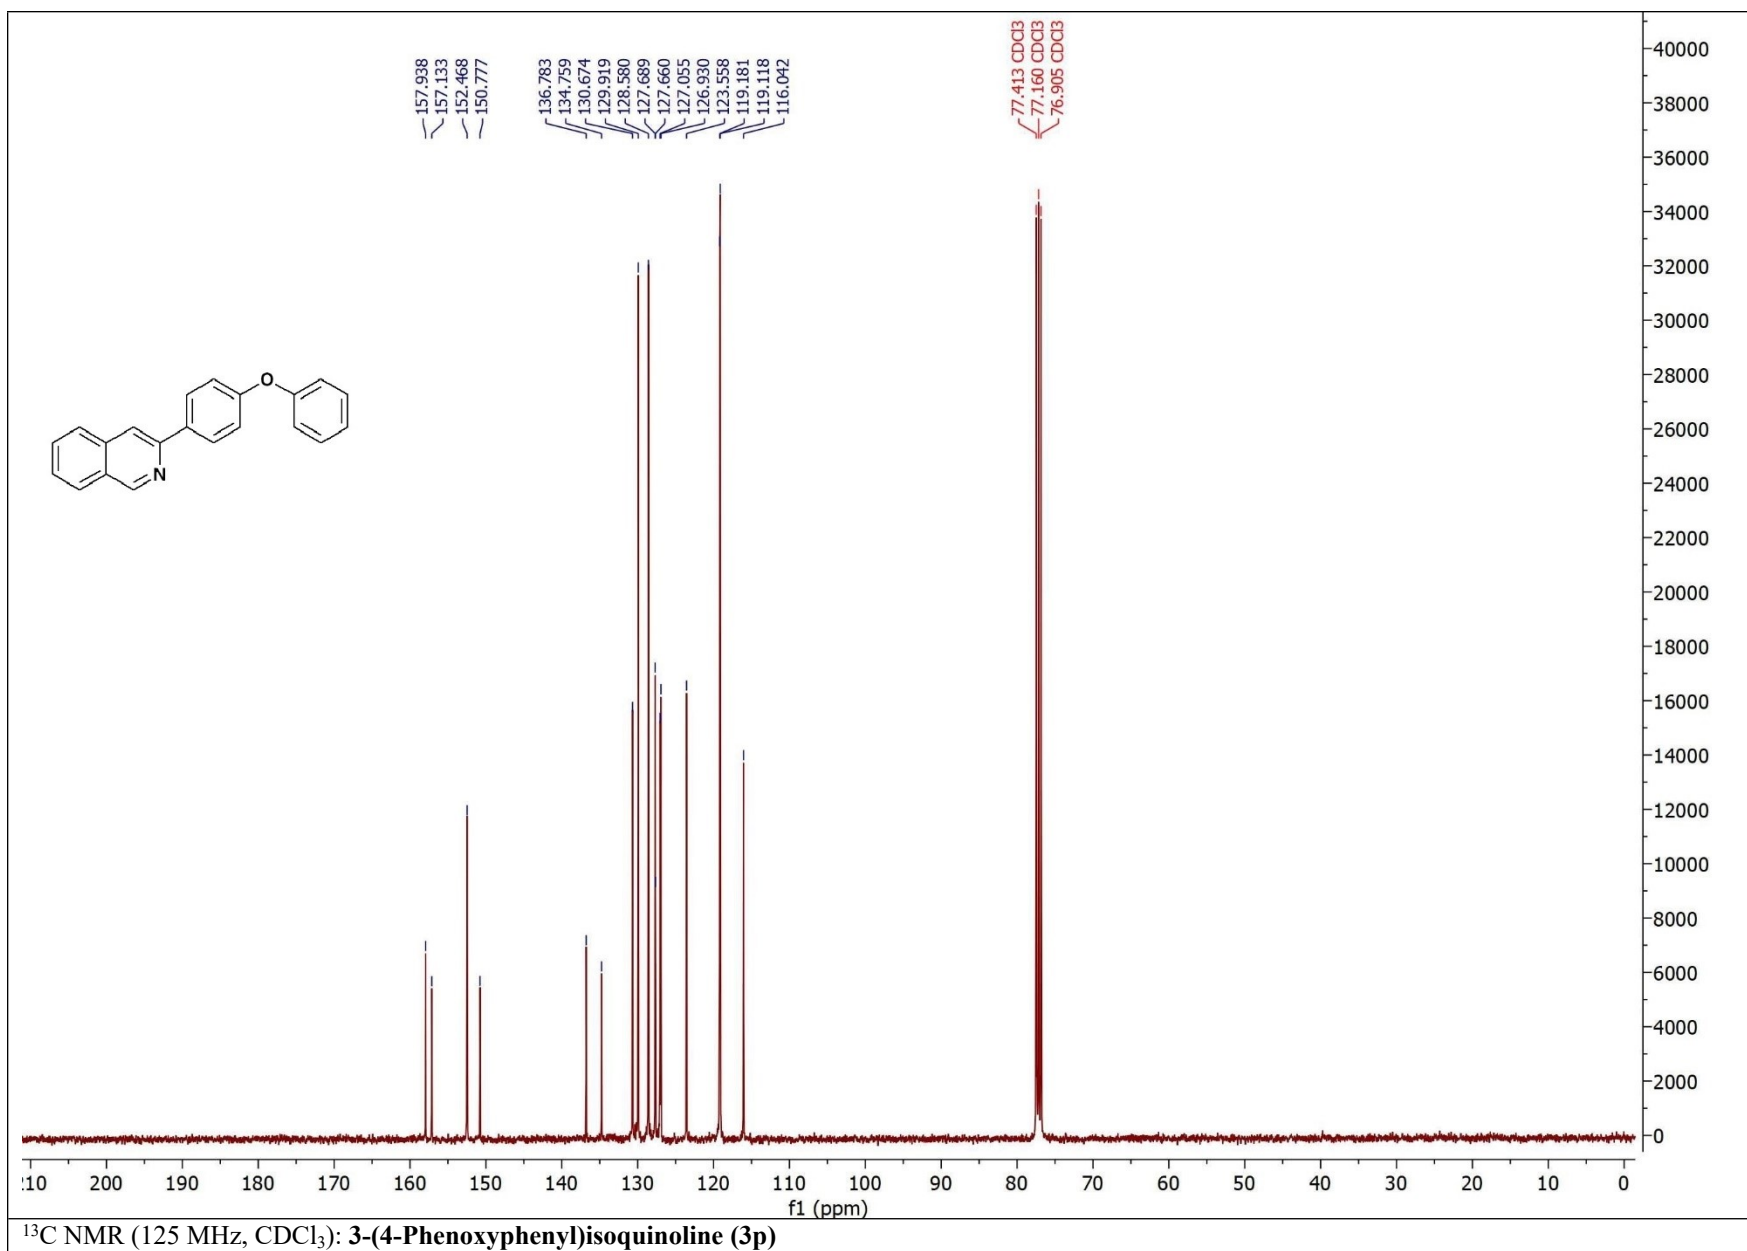



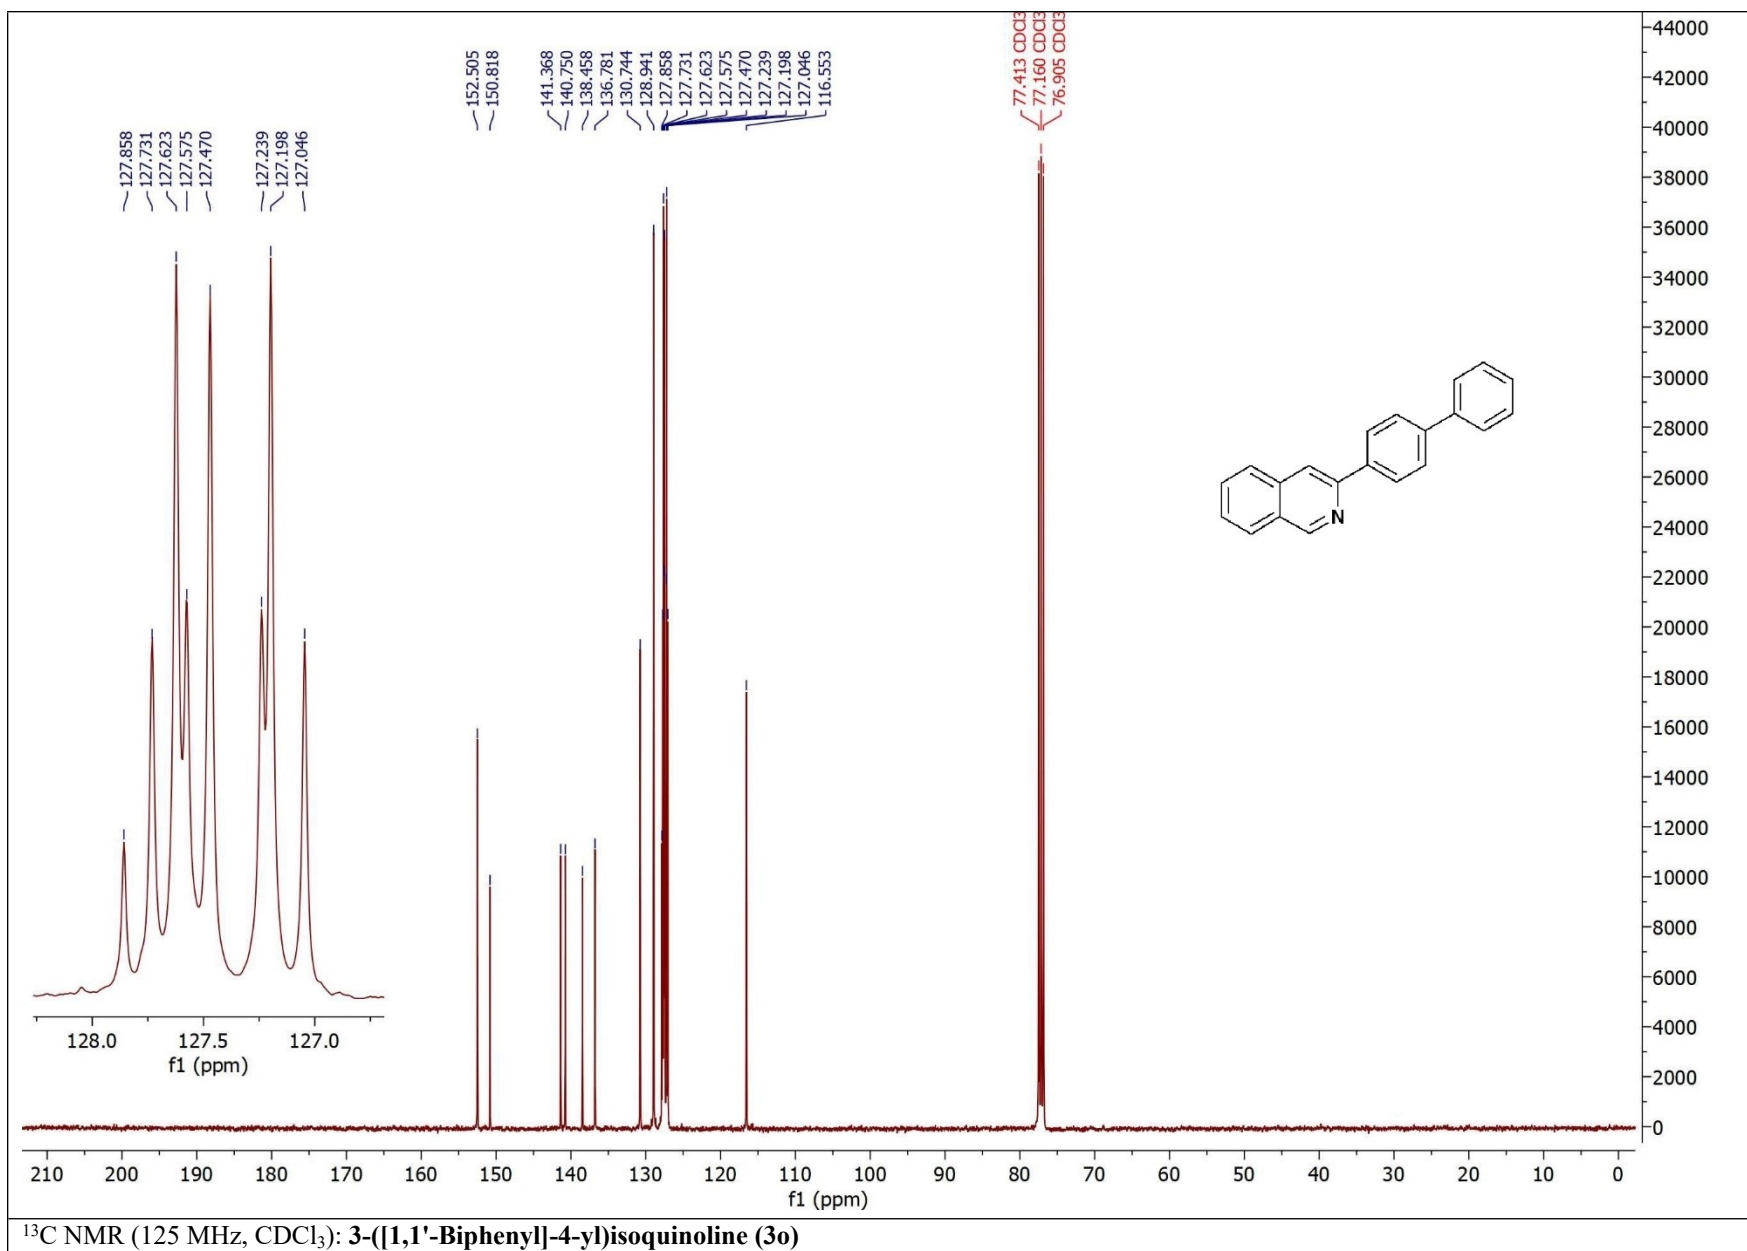

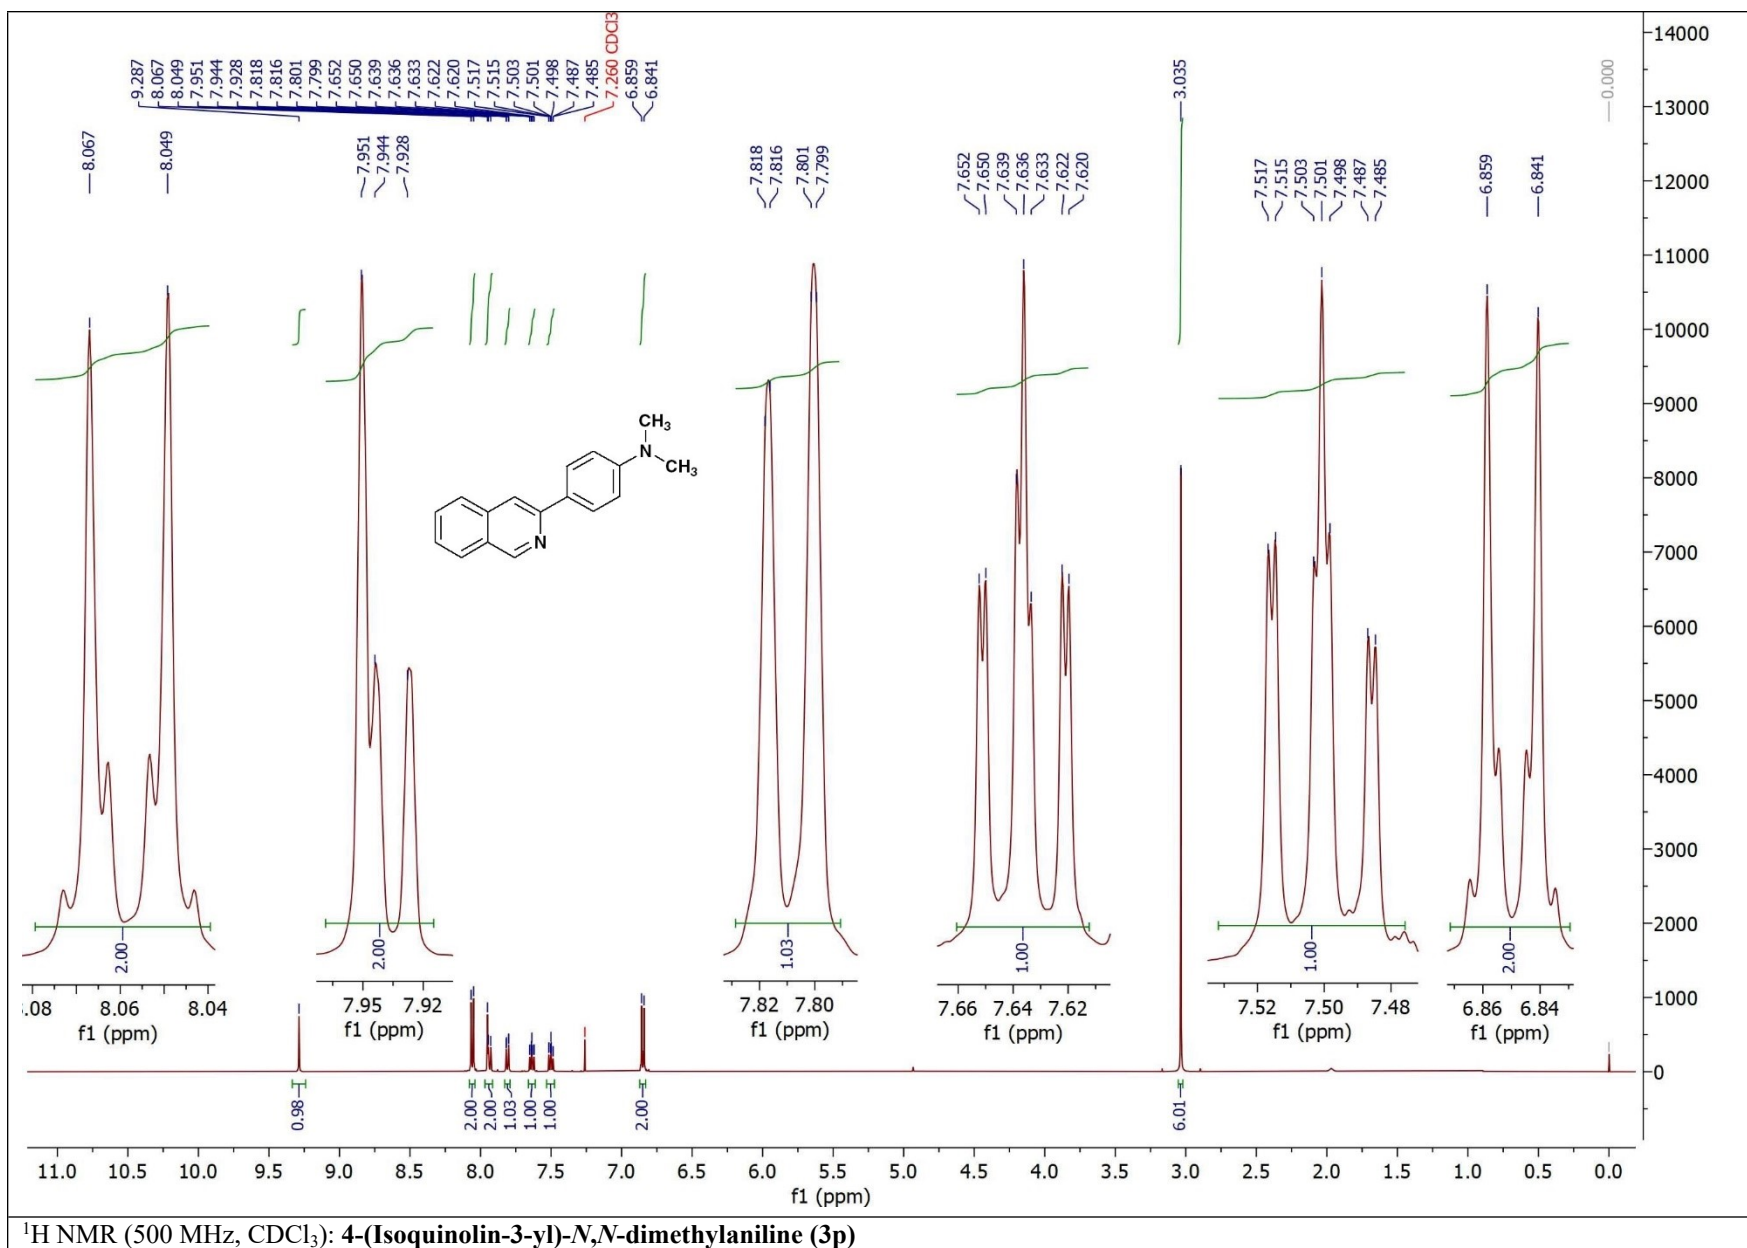

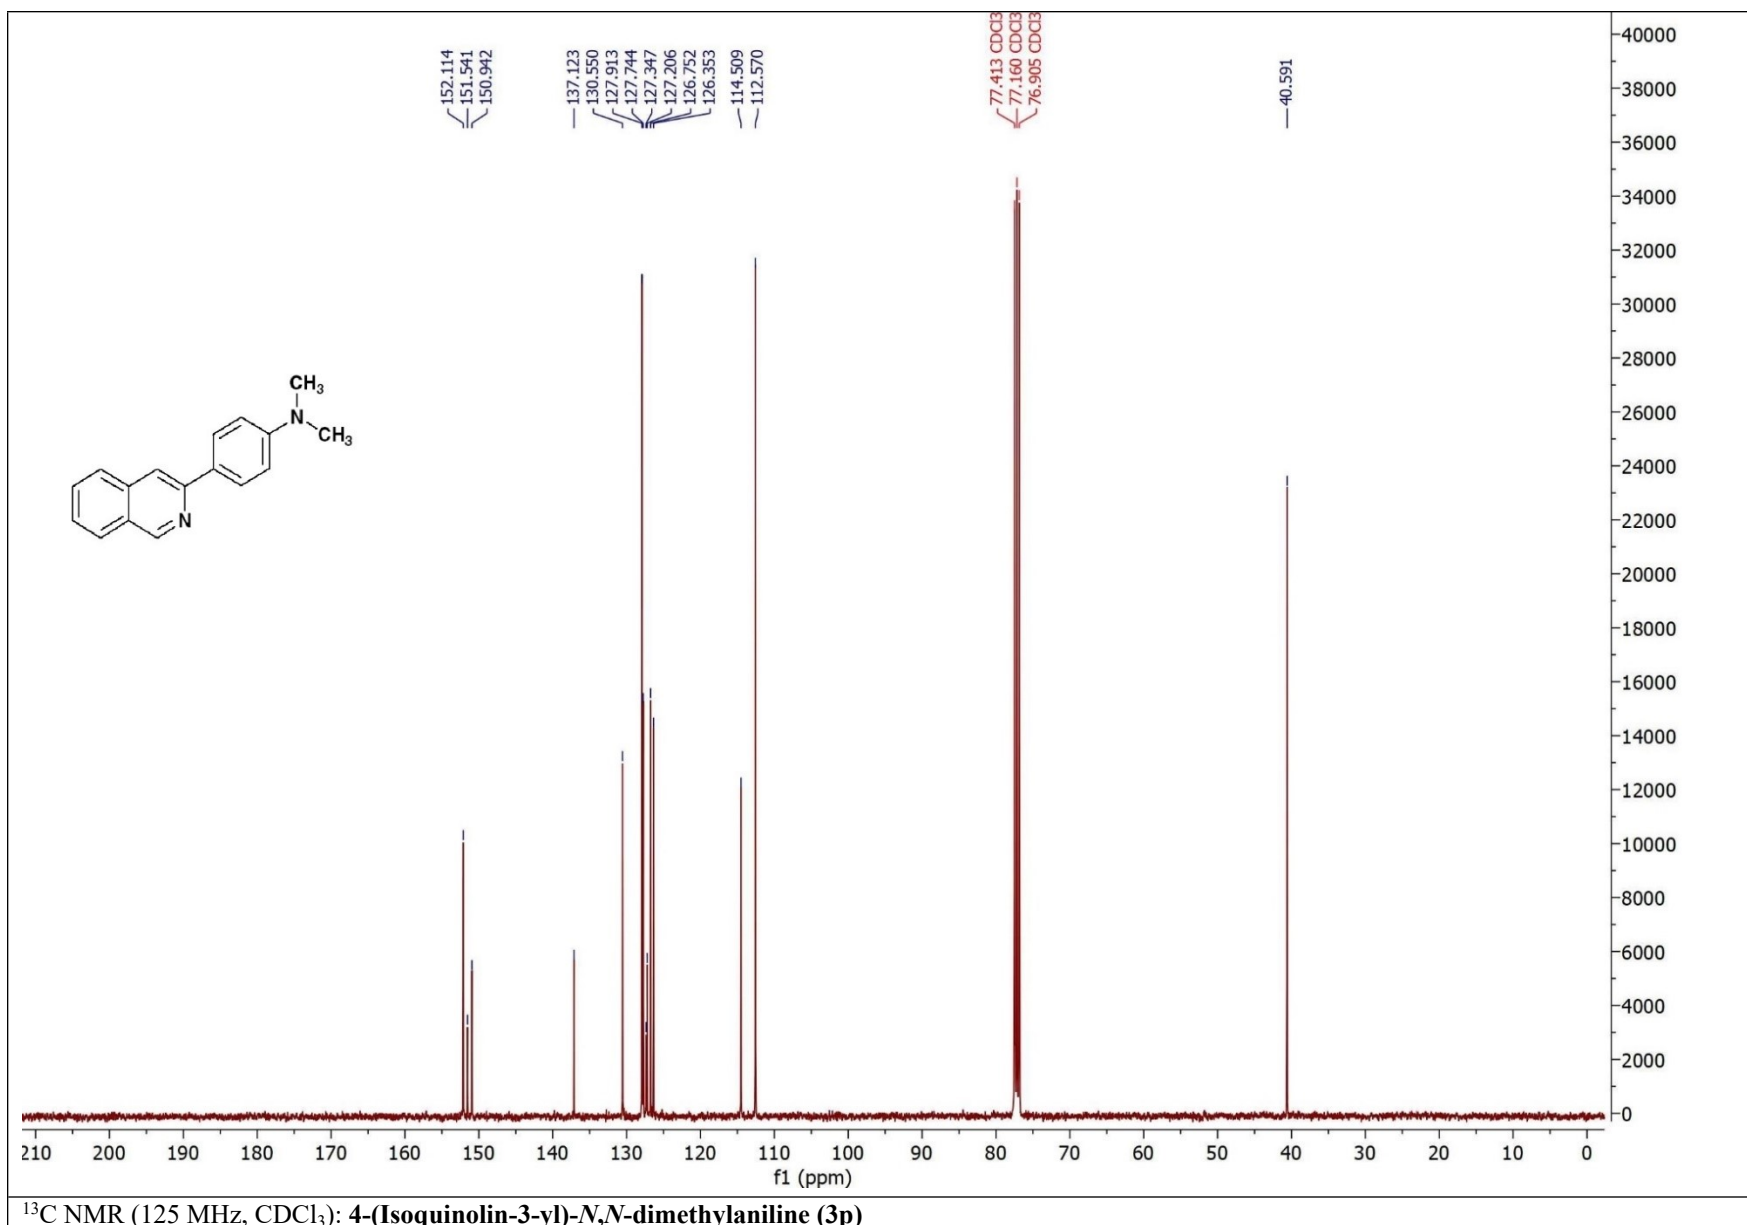

Supplement: d6ra01207h1.pdf [file d6ra01207h1.pdf]
